1

2

3 **Aminoacyl tRNA Synthetases as Malarial Drug Targets:**

4 **A Comparative Bioinformatics Study**

5 Dorothy Wavinya Nyamai, Özlem Tastan Bishop\*

6 Research Unit in Bioinformatics (RUBi), Department of Biochemistry and Microbiology,

7 Rhodes University, Grahamstown 6140, South Africa

8

9 \*Correspondence to o.tastanbishop@ru.ac.za

## 10 **Abstract**

11 Treatment of parasitic diseases has been challenging due to the development of drug  
12 resistance by parasites, and thus there is need to identify new class of drugs and drug targets.  
13 Protein translation is important for survival of plasmodium and the pathway is present in all  
14 the life cycle stages of the plasmodium parasite. Aminoacyl tRNA synthetases are primary  
15 enzymes in protein translation as they catalyse the first reaction where an amino acid is added  
16 to the cognate tRNA. Currently, there is limited research on comparative studies of  
17 aminoacyl tRNA synthetases as potential drug targets. The aim of this study is to understand  
18 differences between plasmodium and human aminoacyl tRNA synthetases through  
19 bioinformatics analysis. *Plasmodium falciparum*, *P. fragile*, *P. vivax*, *P. ovale*, *P. knowlesi*,  
20 *P. bergeri*, *P. malariae* and human aminoacyl tRNA synthetase sequences were retrieved from  
21 UniProt database and grouped into 20 families based on amino acid specificity. Despite  
22 functional and structural conservation, multiple sequence analysis, motif discovery, pairwise  
23 sequence identity calculations and molecular phylogenetic analysis showed striking  
24 differences between parasite and human proteins. Prediction of alternate binding sites  
25 revealed potential druggable sites in PfArgRS, PfMetRS and PfProRS at regions that were  
26 weakly conserved when compared to the human homologues. These differences provide a  
27 basis for further exploration of plasmodium aminoacyl tRNA synthetases as potential drug  
28 targets.

## 29 **Keywords**

30 Aminoacyl tRNA synthetases; motif analysis; phylogenetic tree calculations, homology  
31 modelling

## 32 **Abbreviations**

33 aaRS, aminoacyl tRNA synthetases; RF, rossmann fold; CPI, connective peptide I; MSA,  
34 multiple sequence alignment; CD, catalytic domain; ABD, anticodon binding domain

## 35 **Introduction**

36 Parasitic diseases like trypanosomiasis, malaria, leishmaniasis and filariasis affect millions of  
37 people in the world yearly [1–4]. These diseases cause a remarkable burden in economic  
38 development and health of affected countries and thus the need to come up with control and  
39 prevention strategies. Currently, the main mode of prevention and treatment of these parasitic  
40 diseases is by use of drugs as there are no approved vaccines in the market [5]. However,  
41 most parasites have developed resistance against conventional drugs leading to the drugs  
42 being ineffective [6,7]. Thus, there is need to develop new classes of drugs and to identify  
43 drug targets to solve the shortcoming of drug resistance. Targeting housekeeping pathways  
44 such as protein translation may help deal with drug resistance as they are important for the  
45 survival of most parasites [8–10].

46 *Plasmodium* parasite causes malaria disease, which is a major public concern due to its high  
47 mortality and morbidity rates [10,11]. There are five plasmodium species that cause malaria  
48 in human, and these are *Plasmodium falciparum* (*P. falciparum*), *Plasmodium vivax* (*P.*  
49 *vivax*), *Plasmodium knowlesi* (*P. knowlesi*), *Plasmodium malariae* (*P. malariae*) and  
50 *Plasmodium ovale* (*P. ovale*) [12]. *Plasmodium* has three genomes; cytoplasm, mitochondrial  
51 and apicoplast, and each of them needs a functional protein translation mechanism for growth  
52 and survival [10,13,14]. *Plasmodium* proteins involved in protein translation machinery are  
53 generally encoded by the nuclear genome and exported to target organelles to carry out  
54 various functions in protein synthesis [13,15–17].

55 Aminoacyl tRNA synthetases (aaRSs) are a group of key enzymes in protein translation  
56 pathway; they catalyze the first reaction, where an amino acid is added to the cognate tRNA

57 molecule in the presence of ATP and magnesium ( $Mg^{2+}$ ) ions. This reaction takes place in  
58 two steps; first ATP activates the amino acid through formation of aminoacyl-adenylate  
59 intermediate, while the second step involves ligation of the adenylyate intermediate to the  
60 cognate tRNA molecule through a covalent bond generating AMP [8,9,18]. Although the  
61 canonical function of these enzymes is to add amino acids to tRNA for translation and they  
62 are highly conserved in their catalytic domains, in general aaRSs show sequence, structural  
63 and functional diversity across organisms [19]. Furthermore, in some organisms, aaRSs have  
64 evolved to perform non-canonical functions such as angiogenesis, RNA splicing, signaling  
65 events, transcription regulation, apoptosis and immune responses [20–22]. *P. falciparum*  
66 tyrosyl-tRNA synthetases (PfTyrRS), for instance, have cytokine-like functions, while  
67 eukaryotic methionyl-tRNA synthetases (MetRS) have glutathione-S-transferase domains  
68 that play a key role in protein-protein interactions [23,24]. *P. falciparum* lysyl tRNA  
69 synthetase (PfLysRS) synthesizes diadenosine polyphosphate, a signaling molecule that plays  
70 a role in gene expression, DNA replication and regulation of ion channels of the parasite  
71 [25,26].

72 Of the five human malaria parasites, *P. falciparum*, known to be highly pathogenic, causes  
73 the most severe forms of malaria, and is responsible for most of the malaria mortality cases  
74 reported across the world [27]. *P. falciparum* has a total of 36 aaRSs that are asymmetrically  
75 distributed in either the cytoplasm, mitochondria or the apicoplast compartments. Of the 36  
76 *P. falciparum* aaRSs, 15 reside in the apicoplast, 16 in the cytoplasm and four in  
77 mitochondria: AlaRS, GlyRS, ThrRS and CysRS are found both in the apicoplast and the  
78 cytoplasm and each of the four is encoded by a single gene and exported to the two  
79 compartments while only phenylalanine aminoacyl synthetase (PheRS) is encoded in the  
80 mitochondria [28–30]. *P. falciparum* protein translation in the mitochondria relies on  
81 enzymes imported from the cytoplasm including aaRSs [28]. The apicoplast encodes AspRS,

82 PheRS, ValRS, LysRS, HisRS, AsnRS, ProRS, SerRS, TrpRS, ArgRS, IleRS, GluRS,  
83 LeuRS, TyrRS and MetRS while AlaRS, CysRS ThrRS and GlyRS are reported to have a  
84 single gene encoding both the cytoplasm and apicoplast enzyme [15,17,30,31]. A single  
85 transcript for each gene is spliced alternatively to generate the two isoforms for each protein  
86 which are then targeted to either the cytosol or the apicoplast [29,30]. Each of these genes  
87 encodes a protein with a N-terminal extension that corresponds to a signal and transit peptide  
88 and is conserved in the apicomplexa phylum [29]. *P. falciparum* cytoplasm has genes that  
89 encode ProRS, AspRS, IleRS, LysRS, HisRS, PheRS, AsnRS, ArgRS, GlnRS, SerRS,  
90 TrpRS, ValRS, MetRS, LeuRS, GluRS and TyrRS [31].

91 In human, aaRSs carry out aminoacylation reactions in the cytoplasm, nucleus and the  
92 mitochondria. After tRNA is encoded in the nucleus, it is transported to the cytoplasm where  
93 protein translation takes place [8]. The human mitochondria acquires nuclear-encoded aaRSs  
94 with the aid of translation signals within the aaRSs proteins to carry out protein synthesis  
95 [32]. The cytoplasm is the only compartment where both aminoacylation and protein  
96 synthesis exclusively takes place in humans. Human aaRSs are, thus, classified as  
97 mitochondrial or cytoplasmic based on the compartment where they are localized [32]. In  
98 human, a total of 36 aaRSs have been reported with 17 of them in the mitochondrion and 16  
99 aaRSs exclusively functioning in the cytoplasm while the other three catalyze aminoacylation  
100 reactions in both organelles [8,32]. The three bifunctional aaRSs in human are GlnRS, GlyRS  
101 and LysRS. In the cytoplasm, aminoacylation of proline and glutamate is catalyzed by a  
102 single bifunctional enzyme (Glu/ProRS). Thus, both compartments have enzymes for  
103 charging all the 20 amino acids [32,33].

104 Generally, aaRSs proteins are classified into two distinct classes based on key features of the  
105 catalytic site architecture and the manner of charging tRNA [18,20]. Class I aaRSs include  
106 IleRS, LeuRS, MetRS, CysRS, GlnRS, GluRS, TrpRS, ValRS, ArgRS and TyrRS. Proteins

107 in this class have a catalytic domain (Figure 1A) characterized by a Rossmann fold (RF)  
108 located near the N-terminal [34]. The catalytic domain of this class comprises five parallel  $\beta$ -  
109 sheet strands flanked by  $\alpha$ -helices. The RF possesses highly conserved HIGH and KMSKS  
110 motifs separated by a loop [35,36] as shown in Figure 1A. The HIGH motif is located in a  
111 region formed by a loop linking the first  $\beta$ -sheet strand and the adjacent  $\alpha$ -helix while the  
112 KMSKS motif occurs after the fifth  $\beta$ -sheet strand [8]. The RF domain has an insert known as  
113 the connective peptide I (CPI) in all enzymes in this class whose structure is characteristic of  
114 mixed  $\alpha$  and  $\beta$  folds. Proteins in this class have common domains that include an alpha-  
115 helical anticodon binding domain (ABD), connective peptide (CPI) and the tRNA stem  
116 contact fold [37]. The CPI insert is found towards the end of the first half of the fourth  $\beta$ -  
117 strand of the RF joining the N-terminal and C-terminal sections of the catalytic domain [8].  
118 With the exception of TyrRS, MetRS and TrpRS all Class I enzymes are monomeric [8]. In  
119 monomeric enzymes, the CPI binds tRNA at the 3'- single stranded end while in TrpRS and  
120 TyrRS it forms the dimer interface of these dimeric enzymes [34,38]. In ValRS, IleRS and  
121 LeuRS, the CPI insert is enlarged (250-275 amino acid residues as compared to CysRS and  
122 MetRS where it is 50 and 100 residues respectively) to include an editing domain for editing  
123 misacylated tRNA through hydrolysis [39]. The editing domain proofreads the  
124 aminoacylation process through pre-transfer or post-transfer editing [8]. Post-transfer editing  
125 involves hydrolyzing of misacylated tRNA to amino acid and tRNA while pre-transfer  
126 modification hydrolyzes the mis-activated aminoacyl adenylate to AMP and amino acid [8].  
127 The ABD of proteins in Class I occurs at the C-terminal which binds the anticodons in the  
128 cognate tRNA [40].

129 Class I enzymes binds to the tRNA acceptor end through the minor groove and these  
130 enzymes aminoacylate the 2'-OH group of adenosine nucleotide [8,40]. Proteins in this class  
131 can further be classified into five subclasses based on sequence similarity and

132 physicochemical properties of their substrates [41,42]. Subclass Ia members charge  
133 hydrophobic amino acids that have aliphatic side chains and include ValRS, MetRS, IleRS  
134 and LeuRS. Subclass Ib proteins have charged amino acids as their substrates and include  
135 GlnRS, CysRS and GluRS. Members of subclass Iib bind to the cognate tRNA before  
136 carrying out the aminoacylation process [8,43]. TrpRS and TyrRS belong to subclass Ic and  
137 their substrates are aromatic amino acids. ArgRS is the only member of subclass Id and it  
138 possesses an Add1 domain at the N-terminal whose function is to recognize the D-loop in the  
139 tRNA core (Figure 1A) [8,40]. Class I LysRS found in some bacteria and archaea shares  
140 structural similarity with subclass Ib but it has a unique alpha helix cage and is thus grouped  
141 in subclass Ie [44].

142 Class II aaRSs include HisRS, ProRS, LysRS, SerRS, AspRS, ThrRS, AlaRS, GlyRS, PheRS  
143 and AsnRS. Proteins in this class are further grouped in three subclasses whose members are  
144 more closely related than other subclasses [45,46]. Class IIa proteins exist as dimers and  
145 includes ProRS, SerRS, GlyRS, ThrRS, HisRS and all have the aminoacylation domain at the  
146 N-terminal [8]. Members of this subclass have an ABD at the C-terminal (figure 1B). The  
147 anticodon binding domain is absent in SerRS as this protein does not require an anticodon to  
148 discriminate its cognate tRNA [47,48]. ProRS has editing domains located between motifs I  
149 and II at the catalytic domain while in ThrRS the editing domain is at the N-terminus (Figure  
150 1B) [40]. Members of Class Iib are dimers and have a C-terminal catalytic domain that is  
151 structurally similar and include AspRS, LysRS and AsnRS. The ABD in this subclass is  
152 located at the N-terminal (Figure 1B). Class IIc includes PheRS, AlaRS and GlyRS and all  
153 exist in tetrameric conformation [8,46]. AlaRS possesses a C-Ala domain at the C- terminal  
154 which is absent in other members of Class IIc. The editing domain in AlaRS occurs between  
155 the tRNA binding domain and the C-Ala domain (Figure 1B) [40].

156 Class II enzymes possess a catalytic site domain characterized by seven  $\beta$ -sheet strands  
157 connected by  $\alpha$ -helices [49]. This domain, just like the Class I catalytic domain couples  
158 amino acid, ATP and tRNA 3'-terminus during catalytic reactions [40,50]. Class II catalytic  
159 domain has three weakly conserved motifs (Figure 1B, Figure 2B); Motif I found at the N-  
160 terminal of the catalytic region is characterized by a long  $\alpha$ -helix linked to a short  $\beta$ -strand  
161 with a proline residue at the end which is highly conserved and is involved in homo  
162 dimerization [51]. Motif II juxtaposes amino acid, ATP and tRNA and comprise  $\beta$ - sheet  
163 strands. Motif III is located at the C-terminal of the catalytic domain and binds ATP and  
164 comprise alternate  $\beta$ -strands and  $\alpha$ -helices [36]. LysRS can be classified in both classes based  
165 on the structure and mode of charging tRNA, with Class I LysRS occurring in some bacteria  
166 and most archaea [52] while Class II LysRS occurs in most bacteria and all eukaryotes [8].

167 **Figure 1. Key domains of aminoacyl tRNA synthetases.** A) Class I aaRS showing the  
168 Catalytic Domain (CD) and the anticodon binding domain (ABD). The CD has a CPI insert in  
169 all the proteins in this Class. The CPI insert (orange) in IleRS, LeuRS and ValRS is enlarged  
170 to form an editing domain while in TyrRS and TrpRS it functions in the formation of dimers.  
171 ArgRS has an Add1 domain (cyan) at the N-terminus which is involved in tRNA recognition.  
172 B) Class II aaRS showing the catalytic domain with the three conserved motifs (I, II and III).  
173 In GlyRS, HisRS and ProRS the anticodon binding domain is at the C-terminal. In AspRS,  
174 AsnRS and LysRS it is at the N-terminal, while in AspRS, LysRS and AsnRS proteins the  
175 ABD occurs at the C-terminal. Dimer interfaces are shown by a magenta color and are  
176 characterized by motif I. ProRS has an editing domain that occurs between motif I and II at  
177 the catalytic site while in ThrRS the editing domain is located at the N-terminal. AlaRS has a  
178 C-Ala domain (gold) at the C-terminal that functions in dimer formation.

179

180 **Figure 2 A) The apo structure of PfTyrRS (Class I).** The catalytic domain (residues 22-  
181 260) is shown as cyan (cartoon) while the anticodon binding domain (residues 261-370) is  
182 shown in grey. The highly conserved KMSKS motif (red) and the HIGH motif (yellow) are  
183 shown in the structure. ATP and tyrosine binding sites are shown as blue dotted ellipses.  
184 Asp61, His70, Ala72, Gln73, Gln210, His235, Met237, Leu238, Met248, Lys250 are  
185 involved in ATP binding while residues Tyr60, Glu64, Ala96, Phe99, Ile172, Tyr188, Gln192  
186 and Asp195 are involved in tyrosine binding [53]. B) **Apo structure of PfLysRS (Class II).**  
187 The anticodon binding domain (residues 77-226) is shown in grey cartoon while the catalytic  
188 domain (residues 227-583) is shown in cyan. Motif I (red), motif II (yellow) and motif III  
189 (magenta) are shown by arrows. The ATP binding site and lysine binding site are shown by  
190 the blue dotted ellipses. Residues Arg330, His338, Asn339, Phe342, Glu500, Asn503,



191 Gly556 and Arg559 are implicated in binding of ATP while residues Glu308, Asn330,  
192 Glu346, Tyr348, Asn503, Tyr505, and Glu507 are involved in binding of lysine [54].

193

194 Protein translation has been explored as a target in the development of antimalarial drugs  
195 with most drugs interfering with the ribosome [55]. Recently, there has been increased  
196 interest in exploring *P. falciparum* aaRSs as potential drug targets [15,25,31,55–57].  
197 Plasmodium aaRSs inhibitors have been identified that target either the ATP pocket, the  
198 amino acid or tRNA binding site or the editing domains of some of these enzymes. Some of  
199 the compounds reported to target *P. falciparum* aaRSs are halofuginone, cladosporin, 3-  
200 aminomethyl benzoxaborole AN6426, glyburide and TCMD-124506 [58–61].  
201 Halofuginone, a derivative of febrifugine, targets ProRS tRNA and proline binding site  
202 mimicking tRNA 3'-Adenine 76 and L-pro in an ATP dependent manner [57,62,63].  
203 Halofuginone binding to human and plasmodium ProRS involves identical residues and in  
204 both the compound mimics proline and adenine substrates binding pose thus leading to  
205 toxicity in human cells [58,64,65]. Cladosporin, a secondary metabolite from fungi, is  
206 reported to have activity against blood and liver stage *P. falciparum* and its activity is  
207 selective to only the parasite LysRS protein [25,59]. Cladosporin, an adenosine analogue  
208 binds at the ATP binding site of PfLysRS [25,59]. Cladosporin can, thus, be used as a basis  
209 for development of other scaffolds with improved drug-like properties. The compound 3-  
210 aminomethyl benzoxaborole AN6426 was reported to be active against LeuRS in drug  
211 resistant *P. falciparum* but did not impair growth of the wild type [61]. This compound binds  
212 to the editing domain of PfLeuRS and inhibits it inactivating the 3' Adenine 76 nucleotide of  
213 the cognate tRNA covalently and the catalytic turnover of *P. falciparum* resistant strains [56].  
214 Glyburide and TCMD-124506 are reported to bind to a site adjacent to the ATP binding site  
215 of PfProRS and displace key residues involved in ATP binding thus inhibiting the enzyme

216 activity [60]. Glyburide and TCMDC are selective to PfProRS and do not cause toxicity to  
217 human cells and thus can be used as a basis for development of drugs targeting PfProRS.

218 Due to these shortcomings of the current compounds that target aaRSs and the ever-  
219 increasing antimalarial drug resistance [6,15,16,19,27,66], there is need to develop novel  
220 drugs and identify more targets to counter this resistance. In addition, the development of  
221 drugs that are active against the liver, blood stage parasites [66] and the sexual stages of the  
222 parasites thus terminating the infection cycle would help in malaria eradication [67]. With  
223 aaRSs proteins being present in all stages of the parasite life cycle, identification of subtle  
224 differences between the plasmodium and human proteins would help in achieving this goal.

225 Although aaRS are desirable drug targets, selectivity of drugs to only parasitic aaRS and not  
226 human proteins is a challenge as human aaRS have bacterial and eukaryotic origin [68–70].  
227 High conservation of aaRS across plasmodium and the human host may hinder development  
228 of parasite specific inhibitors [10,71,72]. Comparative studies between host and parasite  
229 sequences and structures are important in identifying differences that can be exploited for  
230 drug development [71,73–75]. The aim of this study was to discern sequence and structural  
231 differences of aaRS between human and plasmodium proteins despite the functional  
232 conservation of these proteins. The differences that occur at the active pockets and the  
233 predicted druggable sites can thus be exploited for development of drugs with good  
234 selectivity [76]. This study included *P. falciparum*, *P. bergeri*, *P. malariae*, *P. ovale*, *P. yoelii*,  
235 *P. vivax*, *P. knowlesi*, *P. fragile*, human and other mammalian sequences. Sequences from  
236 toxoplasma and cryptosporidium species which belong to the apicomplexa family and other  
237 prokaryotes were also included for molecular phylogenetic tree calculations (Additional file  
238 1). Targeting of cytosolic protein machinery in plasmodium shows immediate death while  
239 inhibition of apicoplast protein translation machinery is reported to show delayed death  
240 where parasites die only during the next replication process after treatment [77]; thus, in this

241 study we focus mainly on the cytosolic aaRSs. The sequences were classified into two groups  
242 based on differences in structure of their catalytic domain and further into the different aaRS  
243 families based on their amino acid substrates [18,20,78]. The study was divided into two  
244 parts. First, sequence-based analysis which involved motif search, multiple sequence  
245 alignment and phylogenetic tree calculations was carried out. Secondly, structure-based  
246 analysis was carried out which involved modeling of 3D structures of proteins, mapping of  
247 identified motifs to these structures and identification of probable allosteric drug targeting  
248 sites on the 3D models. The results showed striking differences in motifs and at residue level  
249 between parasite and human proteins. The results from this study thus form a basis for further  
250 research on aaRS as potential antimalarial drug targets and other parasitic diseases.

251

## 252 **Methods**

### 253 **Sequence retrieval**

254 *Plasmodium falciparum* aminoacyl tRNA synthetases (PfaaRS) were retrieved from NCBI-  
255 Protein database [79]. Protein sequences of other plasmodium species and human ones were  
256 searched by BLAST in UniProt using each PfaaRS as the query sequence for the specific  
257 family [80]. The BLASTp algorithm with the default BLOSUM62 matrix was used for the  
258 search of homologous sequences. (Additional file 1). The data set consisted of the five  
259 plasmodium species that infect human, *P. bergeri*, *P. yoelii*, *P. fragile* and human  
260 homologues. For phylogenetic tree calculations, other apicomplexan (cryptosporidium and  
261 toxoplasma) sequences and prokaryote sequences were also retrieved (Additional file 1). The  
262 sequences were then grouped into 20 groups based on the different aaRS families. Retrieved  
263 sequences were also grouped into two classes (Class I and Class II), each consisting of ten  
264 protein families [81,82]. Crystal structures for human and *P. falciparum* ArgRS, TrpRS,  
265 MetRS, TyrRS, LysRS and ProRS proteins were retrieved from Protein Data Bank (PDB)  
266 [83].

### 267 **Motif discovery**

268 Motif discovery was done using Multiple Expectation Maximisation for Motif Elicitation  
269 (MEME) vs 4.11 to identify highly conserved motifs in each aaRS class [84]. A total of 90  
270 motifs with a motif width of 6-50 residues were run for each of the non-homologous classes.  
271 The MAST tool was used to identify overlapping motifs [85]. A Python script was used to  
272 analyse MAST files and MEME log files. Motif conservation was represented as a number of  
273 sites per a total number of class sequences, and the results were displayed as heatmaps.  
274 Further, motif discovery was performed for each aaRS family and the results also displayed

275 as heatmaps. For each aaRS family, the default parameters were used with motif width of 6-  
276 50 residues and the number of motifs run for each family varied (Additional file 3).

## 277 **Homology modelling and model quality assessment**

278 3D structures of *P. falciparum*, *H. sapiens*, *P. bergeri*, *P. malariae*, *P. knowlesi*, *P. fragile*, *P.*  
279 *yoelii*, *P. ovale* and *P. vivax* proteins were built by homology modelling using MODELLER  
280 v9.15 [86]. Templates were identified using HHpred and PRotein Interactive MOdeling  
281 (PRIMO) webserver [87,88] for the six ArgRS, TyrRS, TrpRS, MetRS, LysRS and ProRS  
282 families (Additional file 2). The other families had no good quality templates hence models  
283 were not built. For ArgRS - 5JLD [89]; for MetRS - 4DLP [90]; for TrpRS - 4J75 [91]; for  
284 TyrRS - 5USF [92]; for ProRS - 4NCX [93] and for LysRS - 4DPG [94] was used. For each  
285 protein, 100 models were calculated and the top three models with the lowest z- DOPE  
286 (Discrete Optimized Protein Energy) score were selected for validation. Structure quality  
287 assessment was done using Protein Structure Analysis (PROSA) webserver [95], Verify3D  
288 [96] and Qualitative Model Energy Analysis (QMEAN) [97] and the model with the best  
289 scores was selected for allosteric site prediction and motif mapping.

## 290 **Sequence alignment**

291 For each family of sequences, multiple sequence alignment was carried out using Profile  
292 Multiple Alignment with Local Structures and 3D constraints (PROMALS3D) and Tree-  
293 based Consistency Objective Function Evaluation (TCOFFEE) alignment tools [98,99].  
294 Visualization and editing of the alignments were done using the Jalview vs. 2.10 software  
295 [100]. The alignment results from the two alignment tools were compared, and, in both, it  
296 was observed that the sequences were aligned identically except for the less conserved C-  
297 terminal and N-terminal regions. TCOFFEE sequence alignments were used for the  
298 phylogenetic tree calculations as well as for all versus all pairwise sequence identity

299 calculations via a Python script. The sequence identity results were translated into heatmaps  
300 using a Matlab script.

### 301 **Molecular phylogenetic analysis**

302 Phylogenetic tree calculations were carried out for each family of aaRSs to study  
303 evolutionary relationships within the protein families using Molecular Evolutionary Genetic  
304 Analysis (MEGA) vs7.0 tool [101]. For sequence alignment of each family, three gap  
305 deletion options - 90%, 95% and 100% - were used to calculate the models, and the best three  
306 models for each deletion option were selected based on the lowest Bayesian information  
307 criterion (BIC) scores. Maximum Likelihood (ML) statistical method was used to infer  
308 evolutionary relationship while calculating trees for the top three models for each gap  
309 deletion option for each protein families [102]. Total of 180 (3x3x20) trees were calculated.  
310 Nearest-Neighbor-Interchange search was performed for all the constructed trees. BioNJ and  
311 Neighbor Join algorithms were used for a matrix of pairwise distances calculated using JTT  
312 model to obtain the initial trees for the heuristic search and the topology with the highest log  
313 likelihood selected [103]. A strong branch swap filter and 1000 bootstrap replicates were  
314 used for each tree calculation. The trees were then compared to the bootstrap consensus trees  
315 to ensure that branching patterns were accurate and the best model and gap deletion for each  
316 case was, then, chosen.

### 317 **Prediction of alternate druggable sites**

318 Structure-based drug design and development requires understanding of the structure and  
319 function of the binding sites of the target protein. Identification of new drug targeting sites  
320 different from the validated active sites is key in development of new classes of drugs. In this  
321 study, probable druggable sites of our protein models were determined using FTMap  
322 webserver [104] and SiteMap [105,106]. Homology models were used as input for the

323 prediction of probable druggable sites. The FTMap webserver identifies probable binding  
324 sites by screening of small compounds that vary in shape, polarity and size using an empirical  
325 energy function and the CHARMM force field [104]. The webserver docks isopropanol,  
326 acetaldehyde, phenol, benzaldehyde, urea, dimethyl ether, acetonitrile, ethane, acetamide,  
327 benzene, methylamine, cyclohexane, ethanol, N,N-dimethylformamide, isobutanol and  
328 acetone at the surface of the protein [107]. Clusters of low energy conformations are  
329 calculated and ranking of the probes is done based on the average energy [104]. The site that  
330 binds most of the compounds is considered the active binding site while other regions that  
331 bind several compounds are the predicted binding sites.

332 SiteMap, a tool in Schrödinger suites assigns site points in cavities that are likely to  
333 contribute to protein-protein or protein-ligand interactions based on energetic and geometric  
334 properties [105,106]. The tool uses an algorithm that depends on how well sheltered the sites  
335 from solvents are and how close they are from the protein surface to determine the likeness of  
336 a site point. The sites are classified based on different properties which include; how enclosed  
337 is the site by the protein, the size of the site as measured by the number of points, the degree  
338 by which a ligand can accept or donate hydrogen bonds, how tight the site interacts with the  
339 protein, how exposed the site is to the solvent and the hydrophilic and hydrophobic nature of  
340 the site [105]. The predicted binding sites are then ranked based on a SiteScore calculated  
341 using a linear combination of these factors [105].

## 342 **Results and Discussion**

343 In this study, 92 Class I and 89 Class II proteins were analysed for the eight plasmodium  
344 species and their human homologues. More mammalian sequences were included for MSA  
345 and motif search within each aaRS family to avoid bias. A protein from each aaRS family  
346 was represented for each organism except for PbAspRS which was reported as a putative  
347 protein thus we did not include it in the study. Overall, the study is divided into two parts. In  
348 the first part, sequence related analyses such as MSA, phylogenetic tree calculations and  
349 motif identification were performed with the aim of understanding the general differences  
350 between plasmodial and human proteins. The second part included homology modelling,  
351 mapping of motif information into 3D structures and identification of alternative drug  
352 targeting sites, as the active site within a family of proteins is generally highly conserved,  
353 hence identification of plasmodial protein specific inhibitors might be challenging.

### 354 ***PART 1 – SEQUENCE BASED ANALYSES***

#### 355 **Discovery of motifs that are conserved in each AARS class**

356 Motif analysis was done for each aaRS class (Figure 3 and 4) and for each family (see  
357 Additional file 3 & 4). The results were displayed as heatmaps using a Python script and  
358 mapped to multiple sequence alignment results and available structures. Motifs discovered  
359 for each family varied as shown in Additional file 3 and 4. Motif numbering used in this  
360 section is based on the MEME results.

361 In Class I, 90 motifs were identified as shown in Figure 3. The start and end positions of  
362 highly conserved motifs in this class is shown in Table 1. Motif 1 was conserved in all 92  
363 sequences in this class (Figure 3). This motif contains conserved residues involved in ATP  
364 binding. Motif 2 was present in 45 out of 92 sequences and this motif has also been reported  
365 to be important in ATP binding [40]. Class I aaRS enzymes are known to have a Rossmann



366 fold catalytic domain which is characteristic of the highly conserved Motif 1 and 2 [108,109].  
367 Motif 12, 20 and 65 were also highly conserved among sequences in this class. The other  
368 motifs clustered based on the enzyme family but some were conserved across different  
369 enzymes within the same class. Motif 3, 4, 5, 13 and 14, for example, was conserved in all  
370 GluRS and GlnRS sequences (Figure 3). These shared motifs show that these two proteins  
371 have a high sequence identity and may explain why plasmodium apicoplast GluRS  
372 mischarges glutamine specific tRNA with glutamate. In this case, glutamate is then changed  
373 to glutamine a reaction catalysed by glutamyl-tRNA amidotransferase enzyme [110,111].

374 Motif 1 consisting of the HIGH signature which is characteristic of the Rossmann fold was  
375 conserved in all Class I aaRS (Figure 3) [81]. This class also showed high conservation of a  
376 Motif 2 containing the KMSKS conserved signature which has also been reported to be part  
377 of the RF in this class (Figure 6 & Additional file 3 & 4). The HIGH motif is present in the  
378 first half of the RF while the KMSKS motif is present in the second half of the RF domain  
379 (Figure 5 & Additional file 4). Motif conservation of the Rossmann fold reflects the functional  
380 importance of this region. This fold is involved in ATP binding and has been reported to be  
381 highly conserved in class I proteins [36]. Class I catalytic domain is characteristic of a five  
382 strand parallel sheets flanked by  $\alpha$ -helices with amino acid and ATP binding sites on opposite  
383 sides of a pseudo-2-fold symmetry. The Rossmann fold, in all Class I proteins has a  
384 connective polypeptide I (CPI) insert which is characterized by alpha and beta folds [40]. The  
385 conserved Motifs 1 and 2 across the class are present in the catalytic domains [40]. Detailed  
386 analysis of each protein family showed conserved motifs specific to each family (Additional  
387 file 3). Further, some conserved motifs unique only in the plasmodium proteins were  
388 observed (Figure 4 & Additional file 3 & 4).

389 On mapping the motifs to the multiple sequence alignments, differences at the residue level  
390 were observed despite the high level of motif conservation thus these residues can be the

391 basis of drug discovery. Eukaryote specific motifs in ArgRS, MetRS, GluRS WHEP domain  
392 and AspRS are important for the association of proteins to a multi- tRNA synthetase complex  
393 in eukaryotes [112–114]. In human, nine aaRSs form a complex together with non-synthetase  
394 p18, p38 and p43 accessory proteins [114–116]. Leucyl, isoleucyl, glutaminyl, lysyl,  
395 methionyl, aspartyl, prolyl and glutamyl-tRNA synthetases form the multi-synthetase  
396 complex together with the auxiliary proteins in human aaRS but this complex is not present  
397 in plasmodium aaRSs [34].

398 These unique motifs may also play important roles other than the canonical catalytic roles  
399 [117]. Human LeuRS and GluRS, for example, have been reported to trigger leucine  
400 dependent cellular proliferation and glutamine dependent apoptosis by functioning as amino  
401 acid binding sensors [118,119]. Highly conserved motifs specific to each aaRS group are as a  
402 result of idiosyncratic insertions at the C-terminal or within or after the Rossmann fold of  
403 each protein family in this class [21,40,114] (Additional file 3 & 4). Methionine, valine,  
404 isoleucine and leucine aaRSs are all known to be specific to substrates that have aliphatic side  
405 chains and Motifs 20, 24 and 65 that are highly conserved in these four proteins may have a  
406 role in this specificity [40]. LeuRS, IleRS, MetRS, ArgRS, ValRS and CysRS have a  
407 structurally conserved anticodon binding domain characterized by  $\alpha$ -helices and this may  
408 explain the conservation of Motifs 2, 20, 44 and 65 among these proteins (Figure 3) [40].  
409 Plasmodium TrpRS has an N-terminal extension which is 227 amino acid residues long that  
410 constitute a AlaX-like domain and a linker region that function in binding of tRNA and in  
411 aminoacylation activity [120]. This extension is not present in the human TrpRS and thus  
412 explains the unique motifs at the N- terminal of the plasmodium proteins. Plasmodium  
413 sequences also have a lysine-enriched insertion at the C-terminal end of the KMSKS motif  
414 which is 15 residues long in PfTrpRS which is absent in the human sequence [120]. The  
415 domain for binding anticodons in Class I is located at the carboxyl terminal except for

416 LeuRS. The structures of this region are highly divergent even within the sub-classes and is  
 417 known to play an important role in tRNA discrimination [40].

418 **Figure 3. Motifs identified in Class I aaRS presented as a heat map.** The colours  
 419 represent conservation of motifs of the identified 90 motifs in this class. Conservation  
 420 increases from blue to red while the absence of motifs is shown by a white colour. Motifs not  
 421 present in human aaRS are shown in a red asterisk.

422

423 **Table 1. Highly conserved motifs in Class I aaRS.** Motif 1, 2, 6, 12, 20 and 65 in Class I *P.*  
 424 *falciparum* aaRS and the human homologues. Motif positions in the sequences are indicated  
 425 and dashes are used where the motif is not present.

|         | Motif 1 | Motif 2   | Motif 6 | Motif 12 | Motif 20 | Motif 65 |
|---------|---------|-----------|---------|----------|----------|----------|
| PfArgRS | 134-152 | ----      | ----    | ----     | ----     | ----     |
| HsArgRS | 197-215 | ----      | ----    | ----     | ----     | ----     |
| PfCysRS | 131-149 | 382-419   | ----    | ----     | ----     | ----     |
| HsCysRS | 53-71   | 405-442   | ----    | ----     | 700-714  | ----     |
| PfGlnRS | 284-302 | ----      | ----    | ----     | ----     | ----     |
| HsGlnRS | 266-284 | ----      | ----    | ----     | ----     | ----     |
| PfGluRS | 313-331 | ----      | ----    | ----     | ----     | ----     |
| HsGluRS | 200-218 | ----      | ----    | ----     | ----     | ----     |
| PfIleRS | 127-145 | 782-819   | 623-651 | 222-271  | 167-181  | 91-111   |
| HsIleRS | 44-62   | 599-636   | 444-472 | 139-188  | 94-108   | 63-83    |
| PfLeuRS | 141-159 | 1119-1156 | 688-716 | 219-268  | 181-195  | 160-180  |
| HsLeuRS | 49-67   | 715-752   | ----    | ----     | 89-103   | ----     |
| PfMetRS | 228-246 | 514-551   | ----    | ----     | 268-282  | 247-267  |
| HsMetRS | 269-287 | ----      | ----    | ----     | 310-324  | 289-309  |
| PfTrpRS | 306-324 | ----      | ----    | ----     | 534-548  | ----     |
| HsTrpRS | 159-177 | ----      | ----    | ----     | ----     | ----     |
| PfTyrRS | 61-79   | ----      | ----    | ----     | ----     | ----     |
| HsTyrRS | 53-71   | ----      | ----    | ----     | ----     | ----     |
| PfValRS | 86-104  | 628-665   | 454-482 | 181-230  | 126-140  | 105-125  |
| HsValRS | 340-358 | 861-898   | 708-736 | 435-484  | 380-394  | 359-379  |

426

427 In Class II, there were three highly conserved motifs across the class (Figure 4, Table 2). In  
 428 the reporting of motif results of this class motif names are based on MEME results and not on  
 429 previous literature. Motif 1 was present in 60 sequences, Motif 2 was present in 58 sequences  
 430 while motif 20 was present in 76 sequences out of 89 sequences (Figure 4). Motif 1, motif 2  
 431 and Motif 19 discovered in Class II identified in this study contain the conserved signatures

432 of Class II proteins (motif III, motif II and motif I respectively) reported by Chaliotis et al  
 433 (2016) [36]. In Class II, motifs also clustered based on the protein family. Motif conservation  
 434 among proteins may mean that these regions play a specific function in the proteins. Motif  
 435 discovery was then done for each protein to determine conserved motifs within homologous  
 436 sequences of each protein and the results presented as heat maps (Additional file 3).

437 **Figure 4. Motifs identified in Class II aaRS presented as a heat map.** Motifs not present  
 438 in human aaRS are shown in a red asterisk. The colours represent conservation of the  
 439 identified 90 motifs in this class. Conservation increases from blue to red while the absence  
 440 of motifs is shown by a white colour.

441

442 **Table 2. Highly conserved motifs in Class II aaRS.** Motif 1, 2, 19 and 20 in Class II *P.*  
 443 *falciparum* aaRS and the human homologues. Motif positions in the sequences are indicated  
 444 and dashes are used where the motif is not present.

|         | Motif 1 | Motif 2   | Motif 19 | Motif 20 |
|---------|---------|-----------|----------|----------|
| PfAlaRS | 620-640 | ----      | ----     | 942-962  |
| HsAlaRS | 236-256 | ----      | ----     | 23-43    |
| PfAsnRS | 574-594 | 369-389   | ----     | 343-363  |
| HsAsnRS | 512-532 | 313-333   | 249-289  | ----     |
| PfAspRS | 590-610 | 382-402   | 317-357  | 360-380  |
| HsAspRS | 465-485 | 264-284   | 199-239  | 242-262  |
| PfGlyRS | ----    | 469-489   | ----     | 173-193  |
| HsGlyRS | ----    | 322-342   | ----     | 130-150  |
| PfHisRS | 918-938 | 688-708   | ----     | 658-678  |
| HsHisRS | 378-398 | 148-168   | ----     | 118-138  |
| PfLysRS | 549-569 | 321-341   | 254-294  | 362-382  |
| HsLysRS | 543-563 | 314-334   | 247-287  | ----     |
| PfPheRS | 313-333 | ----      | ----     | 110-130  |
| HsPheRS | 308-328 | ----      | ----     | ----     |
| PfProRS | ----    | 463-483   | ----     | ----     |
| HsProRS | ----    | 1225-1245 | ----     | ----     |
| PfSerRS | ----    | ----      | ----     | 202-222  |
| HsSerRS | ----    | ----      | ----     | 192-212  |
| PfThrRS | 653-673 | ----      | ----     | 358-378  |
| HsThrRS | 444-464 | ----      | ----     | 151-171  |

445

446 Class II aaRS have a highly conserved catalytic domain that occurs as  $\beta$ -sheet strands with  $\alpha$ -  
 447 helices on either side. This domain binds ATP, amino acid and the tRNA during

448 aminoacylation. Motif 1 has been reported previously (as motif III) to be part of the active  
449 site forming  $\alpha$ -helices and  $\beta$ -strands [36,121]. Motif 2, (Figure 4) also found at the catalytic  
450 site of proteins in this group forms  $\beta$  strands in pairs joined by a loop [35]. Motif I plays a  
451 role in binding of ATP while Motif 2 couples ATP, tRNA and amino acid binding [35,122].  
452 Another weakly conserved motif in the active site of these proteins forms an  $\alpha$ -helix that is  
453 linked to a  $\beta$ -strand with a proline residue at the end (Motif 19, Figure 4). This motif is  
454 known to be crucial in formation of dimers in most proteins of this class [123].

455 Further, subclasses in this class have conserved motifs within each subclass (Figure 4). For  
456 example, Ser, Thr, Gly, Pro and His aaRSs all belong to the Class IIa and have anticodon  
457 binding domains that are specific to the subclass [48]. These proteins are specific to small and  
458 hydrophobic amino acids and have motifs that are conserved among them as shown in the  
459 heatmap (Figure 4). The anticodon binding domain comprises of three  $\alpha$ -helices five and  $\beta$ -  
460 stranded sheets and occurs in the C-terminus of this sub-class [48,124,125]. The anticodon  
461 binding domain is absent in SerRS as this protein does not require an anticodon to  
462 discriminate its cognate tRNA [47,48]. Subclass IIb which comprises of AsnRS, LysRS and  
463 AspRS have a unique anticodon binding domain at the N-terminal and share conserved  
464 motifs (Figure 4) [50,126,127]. This subclass of enzymes is specific to large polar and  
465 charged amino acid substrates and are similar in structural organization. AspRS is capable of  
466 catalysing aminoacylation of aspartate and asparagine and thus it can be classified as  
467 discriminating and non-discriminating protein just like GluRS [128,129]. Non-discriminating  
468 AspRS is only present in bacteria and archaea but not in eukaryotes [130]. Family specific  
469 motifs, can be attributed to the diversity in accessory domains found at the N- and C-  
470 terminal or within loops in the core domain [131].

471

## 472 **Multiple sequence alignment and Motif mapping**

473 Plasmodium and mammalian sequences for every aaRS family were aligned using TCOFFEE  
474 as indicated in the methodology. The alignment results were visualized using Jalview  
475 software and motifs discovered for each family mapped to these alignments [100]. A purple  
476 colour was used for the motifs that were conserved in all plasmodium and mammalian  
477 sequences, blue colour for only motifs conserved in mammalian species and green colour for  
478 motifs conserved only in plasmodium sequences (Additional file 4). On carrying out motif  
479 analysis and sequence alignment of Class I aaRSs, it was observed that not all families had  
480 the KMSKS signature though all proteins had the HIGH signature (Additional file 4).  
481 Alignment of ArgRS showed inserts in mammalian ArgRS at both the C- and N-termini that  
482 are not present in plasmodium sequences (Additional file 4A). The highly conserved HIGH  
483 signature in Class I aaRSs catalytic domain was observed in Motif 1 of this family (HVGH)  
484 (Additional file 4A). Motifs 10 and 12 which were conserved only in mammalian sequences  
485 were observed in the N-terminal. Human ArgRS has a basic 72 residue extension at the N-  
486 terminal which is characteristic of mammalian ArgRS and plays a role in interaction with  
487 accessory proteins like p43 to form the multi-synthetase complex [116,132]. Mammals also  
488 have an ArgRS isoform that lacks this extension and is believed to be important in ubiquitin  
489 dependent protein degradation where it forms Arg-tRNA<sup>Arg</sup> which is transferred to ArgRS  
490 which then adds the arginine to all acidic N-terminal amino acids [133,134].

491

492

493 **Figure 5:** Motifs discovered in TyrRS family mapped to the multiple sequence alignment  
494 results. Motif numbering is based on MEME results. A purple colour shows motifs conserved  
495 in all sequences while motifs only present in mammalian sequences are shown in blue. The  
496 highly conserved HIGH and KMSKS motifs in Class II aaRSs are shown in a red and yellow  
497 box respectively.

498

499 CysRS sequence alignment and motif mapping showed a highly conserved core domain and  
500 weakly conserved N- and C-terminal domains. The highly conserved HIGH signature was  
501 found in Motif 2 of this family occurring as HLGH in plasmodium and HMGH in the  
502 mammalian sequences (Additional file 4B). Motif 8, 10, 12, 13, 18 and 19 were conserved  
503 only in mammalian sequences while Motif 11 and 15 were only conserved in plasmodium  
504 sequences analysed in this family (Additional file 4B). GlnRS alignment also showed low  
505 conservation on both termini with inserts observed for the mammalian sequences at the N-  
506 terminal (Additional file 4C). Only two plasmodium specific motifs were found at the core  
507 domain, Motif 23 at the N-terminal end of the highly conserved HIGH signature (Motif 2)  
508 and Motif 29. Motif 8, 9, 11 and 13 were found only in the mammalian species (Additional  
509 file 4C). *P. falciparum* is reported to have Glutathione-S-transferase (GST)-like domains  
510 though their function in the malarial parasite has not been reported [34]. These domains are  
511 important in formation of multi-synthetase complex through protein-protein interactions in  
512 eukaryotes [21,22,117]. GST-like domains have also been reported in MetRS though just like  
513 in GlnRS, the function of these domains in plasmodium is not known unlike in eukaryotes  
514 where they play a role in protein-protein interactions [19].

515 The GluRS family also showed low conservation at the N-terminal with Motif 16 present in  
516 mammalian sequences at this terminal (Additional file 4D). The HIGH signature was found  
517 in Motif 3 as HIGH in all sequences analysed except for PfGluRS where it was HVGH  
518 (Additional file 4). *P. falciparum* GluRS sequence has a glutamine rich N- terminal from  
519 residue 68 as opposed to other plasmodium species. In mammals including human, this

520 enzyme is a bifunctional protein acting both as GluRS and ProRS thus it catalyses  
521 aminoacylation of both proline and glutamate [135]. On alignment with plasmodium GluRS,  
522 the mammalian sequences showed a C-terminal extension indicating that it is the N- terminal  
523 end that catalyses glutamate aminoacylation. The human enzyme contains three motifs that  
524 link the two catalytic domains that function in formation of the multicomplex synthetase and  
525 play a role in protein-nucleic acid interactions [135,136]. Similar motifs have been reported  
526 in other aaRS like GlyRS, HisRS and TrpRS though they occur at the N-or C-termini of the  
527 core domains as a single copy as opposed to the Glu/ProRS where they occur as tandem  
528 repeats linking the two catalytic domains [135–137]. Human IleRS has an extension at the C-  
529 terminal which was absent in plasmodium sequences, but the core domain of this family was  
530 highly conserved (Additional file 4E). Motif 19, 20 and 26 were conserved in the C-terminal  
531 of mammalian sequences but absent in plasmodium sequences. The three tandem motifs in  
532 the human bifunctional Glu/ProRS have been shown to interact with two repeated motifs in  
533 IleRS at the C-terminal extension [138]. In IleRS, the HIGH signature was found in Motif 1  
534 while the KMSKS signature was in Motif 3 occurring as HYGH and KMSKR respectively  
535 (Additional file 4E). Alignment and motif discovery of LeuRS family showed that this family  
536 of protein has low conservation even at the core domain (Additional file 4F). Motif 21, 25  
537 and 27 were conserved in plasmodium sequences. Only Motifs 3, 5, 6, 26 and 36 were  
538 conserved through all mammalian and plasmodium sequences (Additional file 4F). The other  
539 motifs were conserved only in mammalian sequences. The highly conserved Motif 6 had the  
540 HIGH signature occurring as HVGH for PfLeuRS, PmLeuRS, PoLeuRS, PyLeuRS, HMGH  
541 for PfrLeuRS, PvLeuRS and PkLeuRS and HLGH in the analysed mammalian sequences  
542 (Additional file 4F). Anticodon binding domain in LeuRS is located at the C-terminal which  
543 had a low conservation as seen in Additional file 4F and this may provide specific targets for  
544 drug discovery [139]. Motif discovery and alignment of MetRS showed high conservation of



545 mammalian sequences. Some unique motifs were only present in plasmodium MetRS but  
546 were absent in mammalian sequences (Additional file 4G). The highly conserved HIGH  
547 signature was observed in Motif 8 which was conserved in all sequences analysed while the  
548 KMSKS signature was found in Motif 14 conserved in plasmodium and Motif 6 in  
549 mammalian sequences (Additional file 4G). The catalytic domain of MetRS was weakly  
550 conserved with only Motif 1, 2, 4, 8, and 15 being conserved in all sequences at this region.  
551 The C-terminal showed mammalian and plasmodium specific motifs. Motif 5 and 9 found at  
552 the N-terminal were conserved in all analysed sequences in this family (Additional file 4G).

553 TrpRS alignment revealed a plasmodium specific extension at the N-terminal characterised  
554 by Motif 8, 9, 10 and 14 (Additional file 4H). This extension plays a role in aminoacylation  
555 and tRNA binding as reported in *P. falciparum* [34]. In *P. falciparum*, this extension  
556 comprises of a linker region and an AlaX-like domain that plays a role in tRNA binding but  
557 does not edit mis-acylations as observed with *Pyrococcus horikoshii* [120]. The core domain  
558 and the C-terminal of TrpRS family showed highly conserved motifs in all the sequences  
559 with only a short Motif 18 present in mammalian sequences (Additional file 4H). Alignment  
560 and mapping motifs discovered in TyrRS sequences showed high conservation of motifs at  
561 the core domain (Figure 5). Alignment of sequences in this family showed an extension at the  
562 C-terminal of the mammalian TyrRS which was missing in all plasmodium sequences (Figure  
563 5). This extension was characterised by Motifs 6, 8, 9, 11 and 20 which were conserved in all  
564 the mammalian sequences analysed (Figure 5). This extension in human TyrRS is an  
565 endothelial monocyte-activating polypeptide II (EMAPII) domain that has cytokine-like  
566 functions like angiogenesis and inflammation [22,140]. Motif discovery showed that the core  
567 domain is highly conserved across the mammalian and plasmodium TyrRS sequences (Figure  
568 5). The catalytic domain of the human sequence is also different from the malarial parasites  
569 in that it has a buried tripeptide cytokine motif (Glu-Leu-Arg) while in plasmodium this motif

570 is on the surface [22,53]. ValRS alignment showed a N-terminal extension for the  
571 mammalian sequences that was absent in all plasmodium sequences comprising of Motifs 14,  
572 16, 18, 22 and 25 (Additional file 4J). Mapping of motifs showed that the catalytic domain of  
573 proteins analysed in this family are highly conserved though a few plasmodium specific  
574 motifs were observed. The highly conserved HIGH signature was found in Motif 2 of this  
575 family while the KMSKS signature was in Motif 7 (Additional file 4J). The N-terminal  
576 domain showed Motif 16, 33, 34 and 35 which were conserved only in plasmodium  
577 sequences (Additional file 4J). Motifs 20, 30 and 38 that were specific to mammalian  
578 sequences were also observed at the N-terminal (Additional file 4J).

579 Alignment of AlaRS sequences showed a N-terminal extension of varying lengths in the  
580 plasmodium species which was absent in mammalian AlaRS (Additional file 4K). The C-  
581 terminal of the proteins in this family showed Motifs 20, 21 and 29 that were only conserved  
582 in plasmodium sequences and not in human as well as mammalian specific motifs (Motif 8,  
583 14, 17 and 18). AsnRS, LysRS, and AspRS alignment and motif discovery showed low  
584 conservation at the N-terminal while core domains and the C-terminal showed high  
585 conservation. The anticodon binding domain of these proteins is located at the highly variable  
586 N-terminal and thus drugs that specifically bind to the parasite tRNA binding site can be  
587 designed [14,141]. Motif 11, 12 and 17 were conserved in plasmodium sequences of AsnRS  
588 family at the N-terminal while in this region, Motif 5, 6 and 13 conserved in mammalian  
589 sequences were observed (Additional file 4L). In AspRS both the catalytic domain and the C-  
590 terminal were highly conserved with the presence of two short Motifs (16 and 20) conserved  
591 only in mammals (Additional file 4M). GlyRS, HisRS, ProRS, ThrRS families belong to the  
592 subclass IIa and have a highly conserved tRNA binding region at the C-terminal as seen in  
593 the alignments and motifs in this region (Additional file 4 N, O, R and T). HisRS family  
594 showed a N-terminal extension for all plasmodium sequences analysed but absent in the

595 mammalian sequences (Additional file 4O). This extension was characterised by Motifs 11,  
596 12, 14, 15, 17, 18, 19 and 23 (Additional file 4O). However, SerRS which also belongs to this  
597 subclass does not need an anticodon to discriminate its substrate and thus lacks this domain  
598 [48] and the C-terminal of this family showed low conservation (Additional file 4S). ProRS  
599 showed Motif 17 and 20 which were conserved only in plasmodium sequences analysed  
600 (Additional file 4R). Plasmodium ProRS has a Ybak domain at the N-terminal which edits  
601 mischarged Pro-tRNA<sup>Ala</sup> and Pro-tRNA<sup>Ser</sup> and this may explain the plasmodium specific  
602 motifs at the N-terminal [15,34,57]. The mammalian sequences analysed for this family were  
603 of the cytosolic bifunctional Glu/ProRS proteins and this explains the mammalian specific  
604 motifs observed at the N-terminal which is believed to be the region responsible for  
605 glutamate aminoacylation (Additional file 4R).

606 PheRS motif discovery and alignment showed that the plasmodium sequences are highly  
607 variable when compared to mammalian PheRS (Additional file 4Q). Motifs 9, 10, 11 and 13  
608 were conserved only in plasmodium while Motifs 5, 6, 8 and 14 were conserved in  
609 mammalian sequences in this family (Additional file 4Q). Only Motifs 1, 2, 3 and 4 were  
610 conserved across all the sequences in this family (Additional file 4Q). Plasmodium PheRS  
611 has a nuclear localization signal and DNA binding domains and thus in addition to  
612 aminoacylation, this enzyme mediates cellular processes by binding DNA [142]. Despite high  
613 conservation at the aaRS active sites, differences were noted at the residue level after the  
614 sequences were aligned. For example, in LysRS family, *P. falciparum* ATP binding pocket at  
615 positions Val328 and Ser344 corresponds to Gln321 and Thr338 respectively in the human  
616 protein (Figure 6). Residues with a large side chain at this position like observed in human  
617 LysRS do not favour binding of cladosporin a known inhibitor for PfLysRS [25]. These two  
618 residues are thus believed to be responsible for selective binding of cladosporin to *P.*  
619 *falciparum* and not human LysRS [25]. Discovery of drugs that have high specificity to

620 parasitic proteins has for a long time been a challenge resulting in drug toxicity in human  
621 cells [14]. The alignment results showed striking differences at the sequence level of  
622 plasmodium and human aaRSs that can further be explored for the design and development of  
623 drugs with few side effects.

624 **Figure 6: Mapping of discovered motifs in LysRS family to multiple sequence**  
625 **alignment.** A purple colour shows motifs conserved in all sequences while motifs only  
626 present in mammalian sequences are shown in blue. One motif conserved only in  
627 plasmodium species is shown in green. Motif numbering is based on MEME results. The  
628 three conserved signatures in Class II aaRSs are shown in red, yellow and pink boxes. The  
629 red arrows show residues Val328 and Ser344 in *P. falciparum* which are key residues in  
630 binding of ATP.

631

632 **Phylogenetic tree calculations and pairwise sequence identity calculations agree in**  
633 **grouping sequences**

634 On conducting phylogenetic tree analysis, all plasmodium species clustered together, and this  
635 was also seen on performing all versus all pairwise sequence identity calculations (Figure 7,  
636 Figure 8 and Additional file 6). In this study, numbering of sequences in sequence identity  
637 heatmaps was based on the branching of phylogenetic trees. In Class I, plasmodium  
638 sequences in TyrRS family showed the highest sequence identity (above 85%) while GlnRS  
639 plasmodium sequences showed the lowest sequence (below 75%) identity among  
640 plasmodium families. In most of the families, *P. yoelii* and *P. bergeri* sequences were  
641 clustered together in the trees. *P. vivax*, *P. fragile* and *P. knowlesi* were also clustered  
642 together in many families, indicating that they are highly conserved and share evolutionary  
643 history. These similarities were also captured in sequence identity calculations, and reflected  
644 as imaginary boxes in heat maps. Here we will name them as “conservation boxes”. *P. bergeri*  
645 and *P. yoelii* are rodent malaria parasites and are used to study human malaria [143,144]. *P.*  
646 *fragile* infects simians and studies have shown that human red blood cells do not support the  
647 growth of this parasite but it showed a high sequence identity to *P. knowlesi* whose natural

648 vertebrate host is *Macaca fascicularis* but has been reported to infect human in some parts of  
649 Southeast Asia [145,146]. *P. knowlesi* has been reported to have a close phylogenetic  
650 relationship to *P. vivax* [147] and the two showed a sequence identity above 95% in TyrRS  
651 (Figure 8). *P. fragile*-monkey models can thus be used to study parasite-host-system for the  
652 immunological response of the falciparum-like parasite both *in vivo* and *in vitro* [148].

653 In ArgRS sequence identity calculations, plasmodium sequences had above 80% sequence  
654 identity and motif discovery showed that all motifs identified were conserved in all sequences  
655 (Additional file 3 & 6.1). ValRS plasmodium sequences showed 80% sequence identity with  
656 PvValRS, PkValRS and PfrValRS clustering together with a 90% sequence identity. In this  
657 family, PyValRS and PbValRS showed above 95% sequence identity, clustered together in  
658 the phylogenetic tree and shared Motif 36 which was absent in the other plasmodium  
659 sequences (Additional file 3 & 6.11). PvCysRS, PkCysRS and PfrCysRS clustered together  
660 with a 90% sequence identity and shared Motif 22 which was missing in other plasmodium  
661 sequences (Additional file 3 & 6.2). Motif 27 was present only in PyCysRS and PbCysRS  
662 and these two sequences showed a 90% sequence identity Additional file 3 & 6.2). PfrGlnRS,  
663 PkGlnRS and PvGlnRS clustered together and Motif 34, 35 and 37 were only present in these  
664 sequences (Additional file 3 & 6.3). In this family, *E. coli*, human and *S. cerevisiae*  
665 sequences formed an outgroup showing they are the oldest aaRS (Additional file 6.3). GluRS  
666 plasmodium sequences had above 75% sequence identity and shared all identified motifs  
667 (Additional file 3 & 6.4). PbIleRS and PyIleRS shared Motif 38 and 39 and showed 95%  
668 sequence identity (Additional file 3 & 6.5). Cryptosporidium and toxoplasma belong to the  
669 apicomplexan family together with plasmodium and their sequences showed about 50%  
670 sequence identity to plasmodium sequences in IleRS and MetRS family (Additional file 6.5  
671 & 6.7). PvLeuRS, PfrLeuRS and PkLeuRS had 80% sequence identity and shared Motif 39  
672 (Additional file 3 & 6.6). In TrpRS, Motif 21 and 23 were only identified in PbTrpRS and

673 PyTrpRS which had 90% sequence identity. In all families in Class I, human sequences  
674 showed low sequence identities (below 40%) compared to the plasmodium sequences  
675 (Additional file 6).

676  
677 **Figure 7. A)** TyrRS family phylogenetic tree. Maximum Likelihood method was used to  
678 infer evolutionary history using Le\_Gascuel\_2008 model at 95% site coverage [149].  
679 Phylogenetic tree calculations were done using MEGA7 [101]. The tree that had the highest  
680 log likelihood (-2978.09) is shown. Initial tree(s) for the heuristic search were obtained by  
681 using BioNJ and Neighbor-Join algorithms to a matrix of pairwise distances calculated using  
682 a JTT model, and then selecting the topology with higher log likelihood value. A Gamma  
683 distribution was used to calculate evolutionary rate differences among sites (5 categories (+G,  
684 parameter = 0.4355)). Nine amino acid sequences were used for this analysis. There were 343  
685 positions after the calculations. **B)** TyrRS pairwise sequence calculations. The sequence  
686 identity values of the sequences in the TyrRS family is shown. The heatmap shows the  
687 identity scores as a color-coded matrix for every aaRS sequence versus every aaRS sequence  
688 in this family. Conservation increases from blue to red in the heat map.

689  
690  
691 In Class II aaRSs, ProRS family showed the highest sequence identity with plasmodium  
692 sequences having above 80% sequence identity (Additional file 6). The high sequence  
693 identity among plasmodium sequences was also reflected in motif identification where all the  
694 sequences shared the identified motifs (Additional file 3). In Class IIa GlyRS showed the  
695 least conservation with most of the sequences having less than 65% sequence identity  
696 (Additional file 6.16). GlyRS family showed low conservation with sequence identity less  
697 than 70% for all sequences except for PfrGlyRS, PvGlyRS and PkGlyRS which formed a  
698 conservation box with a sequence identity of about 75% (Additional file 6.16). This  
699 clustering was also seen in motif identification whereby PfrGlyRS, PvGlyRS and PkGlyRS  
700 had Motif 24 which was absent in all other plasmodium sequences in this family. PbGlyRS  
701 and PyGlyRS had a sequence identity of 90% and shared Motif 27, 30 and 34 (Additional file  
702 3 & 6.16). *P. falciparum* ThrRS had a low sequence identity compared to other plasmodium  
703 sequences and it also branched separately in the phylogenetic tree. In SerRS family, human,  
704 *T. brucei*, *C. albicans*, *T. gondii* and *C. parvum* also formed a conservation box but with a

705 sequence identity of about 65%. *P. vivax*, *P. fragile* and *P. knowlesi* in this family had a high  
706 sequence identity forming a conservation box and clustered together in the phylogenetic tree  
707 (Additional file 6.20). PfrThrRS, PvThrRS and PkThrRS shared Motif 24, 27, 29 and 33  
708 showing these sequences are closely related as depicted by trees and sequence identity  
709 calculations (Additional file 3 & 6.20). In SerRS family, plasmodium sequences formed a  
710 conservation box with about 75% sequence identity with each other except for *P. yoelii*  
711 which was more identical to *P. bergeri* with a sequence identity of 90% (Additional file 6.19).  
712 In motif identification, *P. yoelii* shared Motif 20 and 22 which were all absent in all other  
713 plasmodium sequences explaining the high sequence conservation (Additional file 3).  
714 PkSerRS and PvSerRS branched together and the two shared Motif 19 showing that the  
715 sequences are closely related (Additional file 3). In HisRS family, all plasmodium sequences  
716 formed a conservation box showing more than 70% sequence identity to each other except for  
717 PfHisRS (Additional file 6.14). This difference was also seen in motifs identified in this  
718 family where Motif 21 was present in all plasmodium sequences but absent in PfHisRS  
719 (Additional file 3).

720 In Class IIb, AsnRS sequences were highly conserved with above 80% sequence identity  
721 while AspRS was the least conserved with about 65% sequence identity (Additional file 6.13  
722 & 6.15). The high sequence conservation in AsnRS was also seen in motif discovery where  
723 all plasmodium sequences shared identified motifs (Additional file 3). In AsnRS family, *C.*  
724 *ubiquitum* showed a higher sequence identity to *S. typhi* sequence than to *T. gondii* which  
725 belongs to the same phylum. PvAspRS and PkAspRS branched together in tree calculation  
726 and these two proteins shared Motif 22, 26 and 28 showing they are closely related  
727 (Additional file 3 & 6.15). In LysRS family, plasmodium sequences showed a sequence  
728 identity of above 75% with PbLysRS and PyLysRS forming a conservation box with about  
729 95% sequence identity (Figure 8). PfrLysRS, PkLysRS and PvLysRS also formed a

730 conservation box and these three proteins shared Motif 15 which was absent in other  
731 plasmodium sequences (Figure 8, Additional file 3).

732 Overall, PheRS was the least conserved family in Class II with plasmodium sequences with  
733 only about 50% sequence identity and this was seen during motif discovery where only a few  
734 motifs were conserved across species (Additional file 3 & 6). In the AlaRS family, *P.*  
735 *falciparum* (sequence 5 in the heatmap) was less conserved compared to other plasmodium  
736 sequences as seen in the (Additional file 6). Plasmodium sequences in AlaRS family showed  
737 a sequence identity above 70% (Additional file 6.12). In this family, *P. vivax*, *P. fragile* and  
738 *P. knowlesi* also formed a conservation box while *P. yoelii* and *P. bergeri* also formed a  
739 conservation box indicating that these sequences are highly conserved compared to other  
740 plasmodium sequences. PfrAlaRS, PvAlaRS and PkAlaRS shared Motif 31 which was absent  
741 in all other plasmodium sequences but present in mammalian sequences (Additional file 3).  
742 In all the families in Class II, human sequences in this class branched out as an out group and  
743 this is supported by the low sequence identity (below 40%) shown in the conservation  
744 heatmaps (Additional file 6).

745 **Figure 8. A)** LysRS family phylogenetic tree. Maximum Likelihood method was used to  
746 infer evolutionary history using Le\_Gascuel\_2008 model at 90% site coverage [149].  
747 Phylogenetic tree calculations were done using MEGA7 [101]. The tree that had the highest  
748 log likelihood (-6116.25) is shown. Initial tree(s) for the heuristic search were obtained by  
749 using BioNJ and Neighbor-Join algorithms to a matrix of pairwise distances calculated using  
750 a JTT model, and then selecting the topology with higher log likelihood value. A Gamma  
751 distribution was used to calculate evolutionary rate differences among sites (5 categories (+G,  
752 parameter = 0.6075)). Eleven amino acid sequences were used for this analysis. There were  
753 503 positions after the calculations. **B)** LysRS pairwise sequence calculations. The sequence  
754 identity values of the sequences in the LysRS family is shown. The heatmap shows the  
755 identity scores as a color-coded matrix for every aaRS sequence versus every aaRS sequence  
756 in this family. Conservation increases from blue to red in the heat map.

757



## 758 **PART 2 – STRUCTURAL ANALYSES**

### 759 **Accurate 3D protein models are calculated for Class I and Class II aaRSs**

760 In the PDB, there are only four Class I (ArgRS, MetRS, TrpRS, TyrRS) and two Class II  
761 (LysRS and ProRS) structures that were available with reasonable quality. As a first step,  
762 each of these crystal structures was remodelled to eliminate the missing residues, except  
763 PfTyrRS, as this structure does not have missing residues. It was previously shown that  
764 homology modelling with a very high sequence template identity (or remodelling itself) does  
765 not introduce modelling errors [150]. As a next step, these models were used to model the 3D  
766 structures of the homologues (see Additional file 2 for further information).

767 For each protein, 100 homology models were calculated, and the three best models selected  
768 based on z-DOPE scores. DOPE score is an atomic statistical potential which depends on a  
769 native protein structure [151]. It is highly accurate in assessment of the quality of protein  
770 models as it accounts for the spherical and finite shape of the protein native structure [151–  
771 153]. It depends on the number of atom pairs considered and thus the number of all possible  
772 pairs of heavy atoms in the protein are normalized to get the z-DOPE score [151,154].  
773 Models with lowest z-DOPE were selected and model quality assessment was done using  
774 Verify 3D [96], ProSA [95] and QMEAN [97] webservers. Verify 3D assesses the  
775 compatibility of the 3D structure with the amino acid sequence (1D) and assigns a class to the  
776 structure based on the local environment, location and secondary structure and compares this  
777 to known native structures [96]. At least 80% of the amino acid residues should have a score  
778 greater than or equal to 0.2 in the 3D/1D profile for the structure to be considered of good  
779 quality. ProSA-web is a tool for checking errors in a 3D model and displays the quality score  
780 as graphical presentation. Areas of the model that are not accurate are identified by a plot of  
781 local quality scores which are then mapped on the 3D structure using colour codes [95].

782 QMEAN score describes the major geometrical aspects of protein models using five  
783 structural descriptors. The overall status of residues is described by a solvation potential,  
784 long-range interactions are assessed by secondary structure-specific pairwise residue-level  
785 potential that is dependent on distance and a torsion angle potential is used to determine the  
786 local geometry which is calculated over three consecutive residues [97]. Descriptors of  
787 solvent accessibility and the agreement between calculated and predicted structures are also  
788 used in calculating the score [97]. All the calculated models passed the quality evaluation  
789 tests from these three tools (Additional file 2).

790 The models for the plasmodium ArgRS were built using 5JLD [89] as a template while 4ZAJ  
791 was used for the human homologue. The ArgRS models consist of the N-terminal, catalytic  
792 domain and the anticodon binding domain. All the models for MetRS, which included the  
793 catalytic domain and the anticodon binding domain, were calculated using 4DLP [90].  
794 Plasmodium TrpRS models were built with 4J75 [155] while 1R6T [156] was used for  
795 HsTrpRS. It was possible to model the N-terminal, catalytic and anticodon binding domains  
796 for this family. The crystal structure 5USF [92] was used for the calculation of plasmodium  
797 TyrRS while 1Q11 [156] consisting only the catalytic and anticodon binding domain was  
798 used to model the HsTyrRS. The catalytic and anticodon binding domains of LysRS were  
799 built using 4DPG [94] as the starting structure while 4NCX [60] was used for building ProRS  
800 models which included a zinc-binding like domain at the C-terminal.

801 The 3D models were, then, used for mapping identified motifs to structures as well as for the  
802 search of alternate druggable sites in *P. falciparum* homologues.

### 803 **Motif mapping to homology models**

804 Out of all identified motifs (Additional file 3), the motifs of the six families with structures  
805 were mapped into the 3D structures (Figure 9, Figure 10 and Additional file 5). The start and

806 end residues for motifs identified in the six families are shown for *P. falciparum* and the  
807 human homologues (Table 3). In ArgRS family, motifs were conserved in all analysed  
808 structures except Motif 16 which was present only in the plasmodium sequences but absent in  
809 in HsArgRS (Additional file 5A, Figure 9). HsArgRS N-terminal had Motifs 10 and 11 which  
810 were absent in plasmodium structures. Motif 13 was not positionally conserved in the  
811 analysed structures. In plasmodium it occurs in the anticodon binding domain and the N-  
812 terminal while in HsArgRS it occurs in catalytic and the anticodon binding domains  
813 (Additional file 5A). In HsMetRS, Motif 5 was in the anticodon binding domain while in  
814 plasmodium structures this motif was mapped to the catalytic site. The motif occurs in an  
815 alpha helix region in HsMetRS while in PfMetRS the site consists of beta sheets. Motif 14  
816 occurring in the catalytic site and a loop region in PfMetRS was missing in HsMetRS  
817 structure (Figure 9). Motif 10 was present in HsMetRS anticodon binding domain but absent  
818 in plasmodium. Other motifs in this family were conserved across all analysed structures. In  
819 TrpRS, Motif 7 was only present in HsTrpRS but absent in all plasmodium structures. Motif  
820 8, 9 and 10 were present only in PyTrpRS (Additional file 5C). Motif 1 and Motif 4 were  
821 mapped at the catalytic domain in all structures except in PyTrpRS where they are in the  
822 anticodon binding domain (Additional file 5C). Motif 2 was present at the catalytic domain of  
823 all the TrpRS homology model structures but absent in PyTrpRS. In TyrRS family, Motif 14  
824 was conserved in PfTyrRS, PkTyrRS, PmTyrRS, PvTyrRS and PyTyrRS while Motif 12 was  
825 only present in human (Figure 9 & Additional file 5D).

826 In Class II, in LysRS, Motif 9 occurs at the catalytic domain in a region consisting of alpha  
827 helices and loops in all structures except PfrLysRS and PmLysRS where it mapped in a  
828 region consisting of both beta strands and alpha helices. PfrLysRS and PmLysRS did not  
829 have Motif 4 present in the anticodon binding domain of all other structures. Motif 8 mapped  
830 in a region consisting of alpha helices in all structures except in PfrLysRS and PmLysRS

831 where the region consisted of beta sheets and alpha helices (Additional file 5E). Mapped  
832 motif in ProRS were conserved in all analysed secondary structures (Figure 10 & Additional  
833 file 5F).

834 **Figure 9: Class I motifs mapped to the homology models of *P. falciparum* and the**  
835 **human homologue.** Motifs are numbered according to the MEME results.

836

837 **Figure 10: Class II motifs mapped to the homology models of *P. falciparum* and the**  
838 **human homologues.** Motifs are numbered according to the MEME results.

839

840 **Table 3:** Starting and ending positions of motifs identified in PfArgRS, PfMetRS, PfTrpRS, PfTyrRS, PfLysRS and PfProRS as well as the  
 841 human homologues. Dashes show where the motif was not present.

|         | Motif 1   | Motif 2   | Motif 3 | Motif 4   | Motif 5   | Motif 6   | Motif 7   | Motif 8 | Motif 9 | Motif 10 | Motif 11  | Motif 12 | Motif 13 | Motif 14  | Motif 15  | Motif 16  | Motif 17 |
|---------|-----------|-----------|---------|-----------|-----------|-----------|-----------|---------|---------|----------|-----------|----------|----------|-----------|-----------|-----------|----------|
| PfArgRS | 135-184   | 441-490   | 308-357 | 506-555   | 364-413   | 30-64     | 230-279   | 70-119  | 186-226 | ----     | ----      | ----     | 15-29    | 558-578   | 420-434   | 286-306   | ----     |
| HsArgRS | 198-247   | 499-548   | 371-420 | 568-617   | 428-477   | 101-135   | 293-342   | 142-191 | 249-289 | 50-99    | 620-660   | 8-48     | 346-360  | 478-498   | 549-563   | ----      | 363-370  |
| PfMetRS | 243-292   | 519-559   | ----    | 439-459   | 331-360   | ----      | ----      | 193-242 | 405-433 | ----     | ----      | 562-611  | ----     | 468-517   | 301-329   | ----      | 657-706  |
| HsMetRS | 285-334   | 598-638   | ----    | 510-530   | 711-740   | ----      | 460-509   | 234-283 | 35-63   | ----     | ----      | 104-153  | 159-208  | ----      | 343-371   | 839-888   | ----     |
| PfTrpRS | 301-350   | 447-496   | 512-561 | 249-298   | 392-441   | 562-611   | ----      | 74-123  | ----    | 124-173  | 1-41      | 203-243  | ----     | 43-71     | 354-368   | 612-626   | 174-199  |
| HsTrpRS | 154-203   | 304-353   | 354-403 | 102-151   | 247-296   | 404-453   | 48-97     | ----    | ----    | ----     | 222-242   | ----     | 6-46     | ----      | 206-220   | 454-468   | ----     |
| PfTyrRS | 172-221   | 60-88     | 265-314 | 320-360   | 91-108    | ----      | 116-144   | ----    | ----    | 223-251  | ----      | ----     | 30-50    | 149-169   | 254-264   | 362-469   | 51-58    |
| HsTyrRS | 150-199   | 39-67     | 240-289 | 295-335   | 69-86     | 488-528   | 97-125    | 395-444 | 339-388 | 200-228  | 447-487   | 1-29     | 129-149  | ----      | 229-239   | 89-96     | 30-37    |
| PfLysRS | 304-353   | 465-514   | 532-581 | 177-226   | 254-303   | 121-170   | 360-409   | 70-119  | 414-463 | 228-248  | ----      | 515-529  | 40-60    | ----      | ----      | 354-359   | ----     |
| HsLysRS | 297-346   | 459-508   | 526-575 | 169-218   | 247-296   | 114-163   | 353-402   | 63-112  | 409-458 | 221-241  | ----      | 509-523  | 577-597  | ----      | ----      | 347-352   | 1-15     |
| PfProRS | 362-411   | 268-317   | 662-711 | 502-551   | 570-606   | 447-496   | 319-359   | ----    | ----    | ----     | 718-746   | ----     | ----     | 418-446   | 615-648   | ----      | 109-149  |
| HsProRS | 1124-1173 | 1030-1079 | 332-381 | 1266-1315 | 1338-1374 | 1209-1258 | 1081-1121 | 447-496 | 666-715 | 392-441  | 1484-1512 | 191-240  | 257-306  | 1180-1208 | 1383-1416 | 1443-1483 | 497-537  |

## 842 **New potential druggable sites in *P. falciparum* aaRSs are identified**

843 FTMap provides information on binding hot spots and the druggability of these sites using  
844 probes from fragment libraries [107]. These fragment hits can be used in identification of hits  
845 from larger ligands. On the other hand, SiteMap predicts possible binding sites using an  
846 algorithm that assigns site points using geometric and energetic properties [105,106]. The site  
847 points are then grouped to give sites which are ranked based on a SiteScore computed based  
848 on size, hydrophobicity, exposure to the solvent and the ease of donating or accepting  
849 hydrogens. Both FTMap and SiteMap showed consistency in prediction of probable binding  
850 sites. In all the six modelled proteins, FTMap and SiteMap were able to predict the known  
851 active sites which consists of the ATP and amino acid binding sites as the highest ranked site  
852 (Figure 11 & 2). Alternative sites were also predicted in PfArgRS, PfMetRS, PfProRS, and  
853 HsProRS that can be targeted for design of new drug classes using both FTMap and SiteMap  
854 (Figure 11, 12 & 13). Since two tools show consistency in prediction of possible binding  
855 sites, we only discuss the results from FTMap in this study.

856 The identified potential druggable site in PfArgRS is in a region located at the anticodon  
857 binding domain characterized by Motif 4 and 6 but the site is not present in HsArgRS (Figure  
858 9 & 11, Table 3). Probes at this site interact with residues in the ABD – His515, Lys518,  
859 Ile522, Lys534, Glu537, Asp541 and Tyr34 located in the N-terminal domain. Motif results  
860 showed low conservation of these residues with His515 corresponding to Cys577, Lys518 to  
861 Arg580, Ile522 to Ile584, Lys534 to Thr592, Glu537 to Asp595, Asp541 to Glu599 and  
862 Tyr34 to Ser105 in the human homologue (Figure 11D). These residues are, however, highly  
863 conserved in the other plasmodium sequences studied (Additional file 4A). This region can  
864 thus be potentially targeted for inhibitor design with high selectivity to the plasmodium  
865 protein as indicated by the low conservation in the human homologue.

866 **Figure 11: Homology models of PfArgRS and HsArgRS and prediction of potential**  
867 **ligand binding sites.** The catalytic domain of the models is shown in cyan, the anticodon  
868 binding domain (ABD) in grey and the N-terminal domains of PfArgRS and HsArgRS are  
869 shown in a light orange colour. The HIGH and KMSKS motifs highly conserved in Class I  
870 are shown in red and yellow respectively. Known druggable sites are shown by the red dotted  
871 ellipses while the predicted site in PfArgRS by FTMap is shown in purple dotted ellipses. **A)**  
872 PfArgRS homology model. **B)** Insert – zoomed view of the predicted druggable site in  
873 PfArgRS with the residues interacting with probes represented as magenta sticks. **C)**  
874 HsArgRS homology model. No probable druggable sites were predicted in human  
875 homologue. **D)** Motif 4 and 6 logos showing conservation of residues in this family and  
876 PfArgRS residues interacting with probes at the predicted site.

877

878 The predicted hotspot in PfMetRS is in a pocket formed by Motifs 5, 9, 14, 20 and the loop  
879 region of Motif 4 (Figure 10 & 12). Motif 5 is present in HsMetRS, but this motif occurs in  
880 the anticodon binding domain while Motif 14 is not present in HsMetRS (Figure 10 & 12).  
881 HsMetRS, however has a Motif 7 present in this site which is absent in the PfMetRS. Probes  
882 at the PfMetRS predicted site were interacting with residues Trp481, Ala421, Asp422,  
883 Arg415, Pro419, Met385, Leu420, Leu423 and Tyr353. Tyr353, Leu420, Asp422 and Ala421  
884 located in Motif 4 and 9 corresponds to Ala733, Val50, Gln52 and Leu51 respectively in the  
885 human homologue. The low conservation of residues in these two motifs may explain why  
886 the probes only docked to PfMetRS and not HsMetRS. This difference in conservation at  
887 residue level in the predicted site can thus be targeted for the potential development of drugs  
888 of that bind selectively to PfMetRS. A study by Hussain *et al* [19] reported an auxiliary  
889 binding site different from ATP and methionine binding sites in PfMetRS. Inhibitors at this  
890 site interacted with residues Phe482, Ile231, His483, Tyr454, Trp447, Ile479 and Leu451  
891 [19]. These residues map to Motif 4 and 14 located at the predicted site by FTMap in  
892 PfMetRS homology model (Table 3). An auxiliary binding pocket has also been reported in  
893 *Trypanosoma brucei* MetRS [157].

894

895 **Figure 12: Homology models of PfMetRS and HsMetRS and prediction of potential**  
896 **ligand binding sites.** The catalytic domain of the models is shown in cyan and the anticodon  
897 binding domain (ABD) in grey. The HIGH and KMSKS motifs are shown in red and yellow  
898 respectively. **A)** PfMetRS homology model. Known druggable sites are shown by the red  
899 dotted ellipses while the predicted site in PfMetRS by FTMap is shown in purple dotted  
900 ellipses. **B)** Insert – zoomed view of the predicted druggable pocket in PfMetRS showing  
901 stick representation (magenta) of residues interacting with probes at this site. The predicted  
902 site is located at the catalytic domain **C)** HsMetRS homology model. HsMetRS had no  
903 probable druggable sites predicted by FTMap. **D)** Motif 5, 9 and 20 logos showing  
904 conservation of residues in this family and PfMetRS residues interacting with probes  
905 predicted site.

906

907 The identified potentially druggable site in PfProRS occurs at a region characterised by Motif  
908 1, 5 and 11 which are also present in HsProRS (Figure 9 & 13). In PfProRS, residues Tyr746,  
909 Thr397, Phe262, Arg401 and Lys394 were interacting with probes docked at this site while in  
910 human, Thr1164, Phe1167, Thr1277, Leu1162, Arg1278 and Thr1276 were interacting with  
911 the probes. All residues implicated in the interaction of probes in PfProRS were conserved in  
912 all the studied sequences in this family except Thr397 which corresponds to Gln1159 in the  
913 human homologue (Figure 13D & Additional file 4R). A previous study by Hewitt *et al* [60]  
914 reported selective binding of glyburide and TCMDC-124506 at the PfProRS predicted site.  
915 This pocket is located at a region formed by  $\alpha 5$  (residues 513-524),  $\alpha 9$  (residues 261-272)  
916 and  $\beta$ -hairpin 1 and 2 (residues 276-287). We observed interaction of Phe262 to the FTMap  
917 probes and Tyr746 (Figure 13) which is also reported to interact with glyburide and TCMDC-  
918 124506 [60]. Inhibition of PfProRS by the two compounds is known to be through distortion  
919 of the ATP binding site [60]. Binding of glyburide and TCMDC-124506 causes movement of  
920 a loop between Val389 and Glu404 displacing Phe405, Arg401 and Arg390 which are key  
921 residues in ATP binding [60]. The unique predicted sites in PfArgRS, PfMetRS and PfProRS  
922 can thus be targeted through high throughput screening to identify new inhibitors.

923 **Figure 13: Build homology models of ProRS and prediction of potential ligand binding**  
924 **sites.** The catalytic domain is shown in cyan, anticodon binding domain in grey and the C-



925 terminal zinc-binding like domain is shown in light pink colour. Motif 2 located at the  
926 catalytic domain is shown in yellow. Known druggable sites are shown by the red dotted  
927 ellipses while other predicted sites by FTMap are shown in purple dotted ellipses. A) The  
928 homology model of PfProRS. B) Insert – zoomed view of the predicted site in PfProRS  
929 showing residues interacting with probes at this site as magenta sticks. These probes were  
930 interacting with residues – Tyr746, Thr397, Phe262, Arg401 and Lys394. C) The homology  
931 model of HsLysRS showing a probable druggable site with residues Thr1164, Phe1161,  
932 Thr1277, Leu1162, Thr1276 and Arg1278 interacting with probes. D) Motif 1 and 11 logos  
933 showing conservation of residues in these motifs and PfProRS residues interacting with  
934 probes at the predicted site.

935

## 936 **Conclusion**

937 Resistance and selectivity remain a challenge when designing anti-parasitic drugs. This study  
938 aimed at getting insights on the differences at sequence and structure level between  
939 plasmodium and human aaRS. Motif analysis of the two aaRSs classes showed family  
940 specific motifs. Further, analysis of motifs for each family showed plasmodium specific and  
941 also mammalian specific motifs. Multiple sequence alignments and motif analysis of aaRS  
942 families showed high conservation of the core domains while N- and C- termini of most  
943 families showed low conservation. Interestingly, the core domain of LeuRS sequences  
944 showed low conservation despite functional conservation. ArgRS sequence alignment  
945 showed mammalian specific inserts at the N- and C-termini while mammalian TyrRS and  
946 ValRS had N-terminal extension not present in plasmodium sequences. Inhibitors can be  
947 designed to target the highly variable ABD located either at the N-terminal or the C-terminal.

948 On doing pairwise sequence identity calculations, ProRS was the most conserved aaRS  
949 family while GlyRS was the least conserved. Phylogenetic studies showed that human  
950 proteins had different evolutionary history to plasmodium proteins with plasmodium  
951 sequences clustering together. Plasmodium sequences also showed high sequence identity  
952 compared to the human homologues which had below 40% sequence identity. *P. yoelii* and *P.*  
953 *bergei* were seen to cluster in trees in most of the aaRS families showing that these proteins

954 are closely related, and this was also depicted by the high sequence identity and shared motifs  
955 among them. *P. fragile*, *P. knowlesi* and *P. vivax* aaRSs were also seen to share evolutionary  
956 history and had high sequence identity. Prediction of additional druggable sites identified hot  
957 spots in PfArgRS, PfMetRS and PfProRS. The identified sites showed low conservation and  
958 variation of identified motifs between *P. falciparum* proteins and the human homologues.  
959 The identified sites can thus be targeted to develop drugs that only selectively bind to  
960 plasmodium proteins. As per the results in this study, it is evident that despite structural  
961 conservation, plasmodium aaRS have key features that differentiate them from human  
962 proteins. These differences can be targeted to develop antimalarial drugs with less toxicity to  
963 the host.

964

965 **Author contributions**

966 Ö.T.B designed the study. D.W.N acquired the data, performed data analysis and wrote the  
967 initial draft. All authors contributed in interpretation and discussion of results and writing of  
968 the manuscript.

969 **Acknowledgements**

970 This work is supported by the National Research Foundation (NRF) South Africa (Grant  
971 Number 105267). The content of this publication is solely the responsibility of the authors  
972 and does not necessarily represent the official views of the funders. D.W.N thanks Rhodes-  
973 Henderson Bursary and National Research Foundation South Africa for financial support.  
974 D.W.N thanks Vuyani Moses for his guidance in performing the calculations and data  
975 analysis.

976

977

978

## 979 **Additional files**

### 980 **Additional file 1**

981 A table showing the data set used in the study with Blast details and crystal structures  
982 retrieved from the Protein Data Bank. The species, E-value, identity, accession number, PDB  
983 ID and sequence lengths are given.

### 984 **Additional file 2**

985 Homology model validation results obtained for Verify 3D, QMEAN and ProSA webservers.  
986 The z-DOPE scores for each model and the templates used for modelling are also shown.

### 987 **Additional file 3**

988 Motifs discovered for the 20 aminoacyl tRNA synthetase families using MEME software.  
989 The default motif width of 6-50 residues was used. The Mast tool was used to identify  
990 overlapping motifs. The number of motifs run for each family varied and motif conservation  
991 was presented as number of sites divided by total number of class sequences and results  
992 displayed as heatmaps. Motif conservation increases from blue to red.

### 993 **Additional file 4**

994 Results on mapping of discovered motifs on multiple sequence alignments for the 20 aaRS  
995 families. Multiple sequence alignment was performed using TCOFFEE software with default  
996 parameters.

### 997 **Additional file 5**

998 Mapping of unique motifs to homology models in plasmodium ArgRS, MetRS, TrpRS,  
999 TyrRS, LysRS and ProRS families and the respective human homologues. Motif numbering  
1000 for each protein is based on the MEME results.

### 1001 **Additional file 6**

1002 Phylogenetic trees and pairwise sequence calculations for aaRS families: Molecular  
1003 Phylogenetic calculations were performed using MEGA7. Sequence identity calculations

1004 were done using an in-house python script and results displayed as heatmaps. Conservation

1005 increases from blue to red.

1006

## 1007 **References**

- 1008 1. Brooker S, Akhwale W, Pullan R, Estambale B, Clarke SE, Snow RW, et al. Epidemiology  
1009 of Plasmodium-helminth co-infection in Africa: Populations at risk, potential impact on  
1010 anemia, and prospects for combining control. *Am J Trop Med Hyg.* 2007;77:88–98.
- 1011 2. Fevre EM, Wissmann B V, Welburn SC, Lutumba P. The burden of human African  
1012 Trypanosomiasis. *PLoS Negl Trop Dis* [Internet]. 2008;2. Available from:  
1013 <http://ovidsp.ovid.com/ovidweb.cgi?T=JS&CSC=Y&NEWS=N&PAGE=fulltext&D=emed8>  
1014 &AN=2009223996
- 1015 3. Gething PW, Patil AP, Smith DL, Guerra C a., Elyazar IRF, Johnston GL, et al. A new  
1016 world malaria map: Plasmodium falciparum endemicity in 2010. *Malar J* [Internet].  
1017 2011;10:378. Available from: <http://eprints.soton.ac.uk/344413/>
- 1018 4. Boatin BA, Basáñez MG, Prichard RK, Awadzi K, Barakat RM, García HH, et al. A  
1019 research agenda for helminth diseases of humans: Towards control and elimination. *PLoS*  
1020 *Negl. Trop. Dis.* 2012.
- 1021 5. Prichard RK, Basanez MG, Boatin BA, McCarthy JS, Garcia HH, Yang GJ, et al. PLOS  
1022 NEGLECTED TROPICAL DISEASES. A Res. Agenda Helminth Dis. Humans Interv.  
1023 Control Elimin. 2012. p. 14.
- 1024 6. Baird JK, J.K. B. Drug therapy: effectiveness of antimalarial drugs. *N Engl J Med*  
1025 [Internet]. 2005;352:1565. Available from:  
1026 [http://ovidsp.ovid.com/ovidweb.cgi?T=JS&PAGE=reference&D=emed7&NEWS=N&AN=2](http://ovidsp.ovid.com/ovidweb.cgi?T=JS&PAGE=reference&D=emed7&NEWS=N&AN=2005172567%5Cnhttp://content.nejm.org/)  
1027 [005172567%5Cnhttp://content.nejm.org/](http://content.nejm.org/)
- 1028 7. Nayyar GML, Breman JG, Newton PN, Herrington J. Poor-quality antimalarial drugs in  
1029 southeast Asia and sub-Saharan Africa. *Lancet Infect. Dis.* 2012. p. 488–96.

- 1030 8. Rajendran V, Kalita P, Shukla H, Kumar A, Tripathi T. Aminoacyl-tRNA synthetases:  
1031 Structure, function, and drug discovery. *Int J Biol Macromol* [Internet]. Elsevier B.V.;  
1032 2018;111:400–14. Available from: <https://doi.org/10.1016/j.ijbiomac.2017.12.157>
- 1033 9. Fang P, Guo M. Evolutionary Limitation and Opportunities for Developing tRNA  
1034 Synthetase Inhibitors with 5-Binding-Mode Classification. *Life* [Internet]. 2015;5:1703–25.  
1035 Available from: <http://www.mdpi.com/2075-1729/5/4/1703>
- 1036 10. Manickam Y, Chaturvedi R, Babbar P, Malhotra N, Jain V, Sharma A. Drug targeting of  
1037 one or more aminoacyl-tRNA synthetase in the malaria parasite *Plasmodium falciparum*.  
1038 *Drug Discov Today* [Internet]. Elsevier Current Trends; 2018 [cited 2018 Jun 12]; Available  
1039 from: <https://www.sciencedirect.com/science/article/pii/S135964461730538X>
- 1040 11. World Health Organization W, WHO, World Health Organization W. World Malaria  
1041 Report 2015. *World Health*. 2015;1–280.
- 1042 12. Antinori S, Galimberti L, Milazzo L, Corbellino M. Biology of human malaria plasmodia  
1043 including *Plasmodium knowlesi*. *Mediterr J Hematol Infect Dis*. 2012;4.
- 1044 13. Jackson KE, Habib S, Frugier M, Hoen R, Khan S, Pham JS, et al. Protein translation in  
1045 *Plasmodium* parasites. *Trends Parasitol*. 2011. p. 467–76.
- 1046 14. Pham JS, Dawson KL, Jackson KE, Lim EE, Pasaje CFA, Turner KEC, et al. Aminoacyl-  
1047 tRNA synthetases as drug targets in eukaryotic parasites. *Int. J. Parasitol. Drugs Drug Resist*.  
1048 2014. p. 1–13.
- 1049 15. Khan S, Sharma A, Jamwal A, Sharma V, Pole AK, Thakur KK, et al. Uneven spread of  
1050 cis- and trans-editing aminoacyl-tRNA synthetase domains within translational compartments  
1051 of *P. falciparum*. *Sci Rep* [Internet]. 2011;1:188. Available from:  
1052 <http://www.nature.com/articles/srep00188>

- 1053 16. Pino P, Aeby E, Foth BJ, Sheiner L, Soldati T, Schneider A, et al. Mitochondrial  
1054 translation in absence of local tRNA aminoacylation and methionyl tRNAMet formylation in  
1055 Apicomplexa. *Mol Microbiol.* 2010;76:706–18.
- 1056 17. Jackson KE, Pham JS, Kwek M, De Silva NS, Allen SM, Goodman CD, et al. Dual  
1057 targeting of aminoacyl-tRNA synthetases to the apicoplast and cytosol in *Plasmodium*  
1058 *falciparum*. *Int J Parasitol* [Internet]. Australian Society for Parasitology Inc.; 2012;42:177–  
1059 86. Available from: <http://dx.doi.org/10.1016/j.ijpara.2011.11.008>
- 1060 18. Ibba M, Söll D. Aminoacyl-tRNA Synthesis. *Annu Rev Biochem* [Internet].  
1061 2000;69:617–50. Available from:  
1062 <http://www.annualreviews.org/doi/10.1146/annurev.biochem.69.1.617>
- 1063 19. Hussain T, Yogavel M, Sharma A. Inhibition of protein synthesis and malaria parasite  
1064 development by drug targeting of methionyl-tRNA synthetases. *Antimicrob Agents*  
1065 *Chemother.* 2015;59:1856–67.
- 1066 20. Park SG, Schimmel P, Kim S. Aminoacyl tRNA synthetases and their connections to  
1067 disease. *Proc Natl Acad Sci U S A* [Internet]. 2008;105:11043–9. Available from:  
1068 <http://europepmc.org/articles/PMC2516211/?report=abstract>
- 1069 21. Guo M, Schimmel P, Yang XL. Functional expansion of human tRNA synthetases  
1070 achieved by structural inventions. *FEBS Lett.* 2010. p. 434–42.
- 1071 22. Paul M, Schimmel P. Essential nontranslational functions of tRNA synthetases. *Nat*  
1072 *Chem Biol* [Internet]. 2013;9:145–53. Available from:  
1073 <http://www.nature.com/doi/10.1038/nchembio.1158>
- 1074 23. Bhatt TK, Khan S, Dwivedi VP, Banday MM, Sharma A, Chandele A, et al. Malaria  
1075 parasite tyrosyl-tRNA synthetase secretion triggers pro-inflammatory responses. *Nat*



- 1076 Commun [Internet]. 2011;2:530. Available from:  
1077 <http://www.nature.com/doi/10.1038/ncomms1522>
- 1078 24. Wolf YI, Aravind L, Grishin N V., Koonin E V. Evolution of Aminoacyl-tRNA  
1079 synthetases-analysis of unique domain architectures and phylogenetic trees reveals a complex  
1080 history of horizontal gene transfer events. *Genome Res.* 1999;9:689–710.
- 1081 25. Sharma A, Khan S, Sharma A, Belrhali H, Yogavel M. Structural basis of malaria  
1082 parasite lysyl-tRNA synthetase inhibition by cladosporin. *J Struct Funct Genomics.*  
1083 2014;15:63–71.
- 1084 26. Sherma A, Yogavel M, Sharma A. Structural and functional attributes of malaria parasite  
1085 diadenosine tetraphosphate hydrolase. *Sci Rep* [Internet]. Nature Publishing Group;  
1086 2016;6:1–12. Available from: <http://dx.doi.org/10.1038/srep19981>
- 1087 27. Miller LH, Baruch DI, Marsh K, Doumbo OK. The pathogenic basis of malaria. *Nature.*  
1088 2002;415:673–9.
- 1089 28. Sharma A, Sharma A. *Plasmodium falciparum* mitochondria import tRNAs along with an  
1090 active phenylalanyl-tRNA synthetase. *Biochem J* [Internet]. 2015;465:459–69. Available  
1091 from: <http://www.biochemj.org/bj/465/bj4650459.htm>
- 1092 29. Jackson KE, Pham JS, Kwek M, De Silva NS, Allen SM, Goodman CD, et al. Dual  
1093 targeting of aminoacyl-tRNA synthetases to the apicoplast and cytosol in *Plasmodium*  
1094 *falciparum*. *Int J Parasitol* [Internet]. Pergamon; 2012 [cited 2018 Jun 12];42:177–86.  
1095 Available from:  
1096 <https://www.sciencedirect.com/science/article/pii/S0020751911002992?via%3Dihub>
- 1097 30. Pham JS, Sakaguchi R, Yeoh LM, De Silva NS, McFadden GI, Hou Y-M, et al. A dual-  
1098 targeted aminoacyl-tRNA synthetase in *Plasmodium falciparum* charges cytosolic and

- 1099 apicoplast tRNACys. *Biochem J* [Internet]. 2014;458:513–23. Available from:  
1100 <http://www.ncbi.nlm.nih.gov/pubmed/24428730>
- 1101 31. Manickam Y, Chaturvedi R, Babbar P, Malhotra N, Jain V, Sharma A. Drug targeting of  
1102 one or more aminoacyl-tRNA synthetase in the malaria parasite *Plasmodium falciparum*.  
1103 *Drug Discov Today* [Internet]. Elsevier Ltd; 2018;0:26–33. Available from:  
1104 <http://dx.doi.org/10.1016/j.drudis.2018.01.050>
- 1105 32. Bonnefond L, Fender A, Rudinger-Thirion J, Giegé R, Florentz C, Sissler M. Toward the  
1106 full set of human mitochondrial aminoacyl-tRNA synthetases: Characterization of AspRS and  
1107 TyrRS. *Biochemistry*. 2005;44:4805–16.
- 1108 33. Antonellis A, Green ED. The Role of Aminoacyl-tRNA Synthetases in Genetic Diseases.  
1109 *Annu Rev Genomics Hum Genet* [Internet]. 2008;9:87–107. Available from:  
1110 <http://www.annualreviews.org/doi/10.1146/annurev.genom.9.081307.164204>
- 1111 34. Bhatt TK, Kapil C, Khan S, Jairajpuri MA, Sharma V, Santoni D, et al. A genomic  
1112 glimpse of aminoacyl-tRNA synthetases in malaria parasite *Plasmodium falciparum*. *BMC*  
1113 *Genomics*. 2009;10:644.
- 1114 35. Eriani G, Cavarelli J, Martin F, Ador L, Rees B, Thierry JC, et al. The class II aminoacyl-  
1115 tRNA synthetases and their active site: Evolutionary conservation of an ATP binding site. *J*  
1116 *Mol Evol*. 1995;40:499–508.
- 1117 36. Chaliotis A, Vlastaridis P, Mossialos D, Ibba M, Becker HD, Stathopoulos C, et al. The  
1118 complex evolutionary history of aminoacyl-tRNA synthetases. *Nucleic Acids Res* [Internet].  
1119 2016;45:gkw1182. Available from: <http://www.ncbi.nlm.nih.gov/pubmed/27903912>
- 1120 37. Chen JF, Guo NN, Li T, Wang ED, Wang YL. CP1 domain in *Escherichia coli* leucyl-  
1121 tRNA synthetase is crucial for its editing function. *Biochemistry*. 2000;39:6726–31.

- 1122 38. Doublé S, Bricogne G, Gilmore C, Carter, CW. Tryptophanyl-tRNA synthetase crystal  
1123 structure reveals an unexpected homology to tyrosyl-tRNA synthetase. *Structure*. 1995;3:17–  
1124 31.
- 1125 39. Yadavalli SS, Ibba M. Quality control in aminoacyl-tRNA synthesis: Its role in  
1126 translational fidelity. *Adv. Protein Chem. Struct. Biol.* 2012. p. 1–43.
- 1127 40. Perona JJ, Hadd A. Structural diversity and protein engineering of the aminoacyl-tRNA  
1128 Synthetases. *Biochemistry*. 2012;51:8705–29.
- 1129 41. Cusack S. Aminoacyl-tRNA synthetases Stephen Cusack. *Curr Opin Struct Biol*  
1130 [Internet]. 1997;7:881–9. Available from: <http://biomednet.com/eleceref/O959440X00700881>
- 1131 42. Perona JJ, Gruic-Sovulj I. Synthetic and editing mechanisms of aminoacyl-tRNA  
1132 synthetases. *Top. Curr. Chem.* 2014. p. 1–41.
- 1133 43. Ibba M, Losey HC, Kawarabayasi Y, Kikuchi H, Bunjun S, Söll D. Substrate recognition  
1134 by class I lysyl-tRNA synthetases: a molecular basis for gene displacement. *Proc Natl Acad*  
1135 *Sci U S A*. 1999;96:418–23.
- 1136 44. Bennett EJ, Shaler T a, Woodman B, Ryu K-Y, Zaitseva TS, Becker CH, et al. Anticodon  
1137 recognition and discrimination by the alpha-helix cage domain of class I lysyl-tRNA  
1138 synthetase. *J Biol Chem* [Internet]. 2007;282:11033–8. Available from:  
1139 <http://www.ncbi.nlm.nih.gov/pubmed/17540772>  
1140 <http://www.pubmedcentral.nih.gov/articlerender.fcgi?artid=2816034&tool=pmcentrez&rendertype=abstract>  
1141 <http://www.ncbi.nlm.nih.gov/pubmed/17567576>  
1142 <http://www.ncbi.nlm.nih.gov/pubmed/17581591>
- 1143 45. Pouplana LR, Buechter DD, Davis MW, Schimmel P. Idiographic representation of  
1144 conserved domain of a class II tRNA synthetase of unknown structure. *Protein Sci.*

1145 1993;2:2259–62.

1146 46. Smith TF, Hartman H. The evolution of Class II Aminoacyl-tRNA synthetases and the  
1147 first code. FEBS Lett [Internet]. Federation of European Biochemical Societies;  
1148 2015;589:3499–507. Available from: <http://dx.doi.org/10.1016/j.febslet.2015.10.006>

1149 47. Normanly J, Ollick T, Abelson J. Eight base changes are sufficient to convert a leucine-  
1150 inserting tRNA into a serine-inserting tRNA. Proc Natl Acad Sci U S A [Internet].  
1151 1992;89:5680–4. Available from:  
1152 [http://www.pubmedcentral.nih.gov/articlerender.fcgi?artid=49356&tool=pmcentrez&rendert](http://www.pubmedcentral.nih.gov/articlerender.fcgi?artid=49356&tool=pmcentrez&rendertype=abstract)  
1153 [ype=abstract](http://www.pubmedcentral.nih.gov/articlerender.fcgi?artid=49356&tool=pmcentrez&rendertype=abstract)

1154 48. Yao P, Fox PL. Aminoacyl-tRNA synthetases in medicine and disease. EMBO Mol. Med.  
1155 2013. p. 332–43.

1156 49. Martinez-Rodriguez L, Erdogan O, Jimenez-Rodriguez M, Gonzalez-Rivera K, Williams  
1157 T, Li L, et al. Functional class I and II amino acid-activating enzymes can be coded by  
1158 opposite strands of the same gene. J Biol Chem. 2015;290:19710–25.

1159 50. Ruff M, Krishnaswamy S, Boeglin M, Poterszman a, Mitschler a, Podjarny a, et al.  
1160 Class II aminoacyl transfer RNA synthetases: crystal structure of yeast aspartyl-tRNA  
1161 synthetase complexed with tRNA(Asp). Science. 1991;252:1682–9.

1162 51. Bhatt T, Kapil C, Khan S, Jairajpuri M, Sharma V, Santoni D, et al. A genomic glimpse  
1163 of aminoacyl-tRNA synthetases in malaria parasite Plasmodium falciparum. BMC Genomics  
1164 [Internet]. 2009;10:644. Available from:  
1165 <http://bmcgenomics.biomedcentral.com/articles/10.1186/1471-2164-10-644>

1166 52. Ibba M, Bono JL, Rosa P a, Söll D. Archaeal-type lysyl-tRNA synthetase in the Lyme  
1167 disease spirochete *Borrelia burgdorferi*. Proc Natl Acad Sci U S A. 1997;94:14383–8.

- 1168 53. Bhatt TK, Khan S, Dwivedi VP, Banday MM, Sharma A, Chandele A, et al. Malaria  
1169 parasite tyrosyl-tRNA synthetase secretion triggers pro-inflammatory responses. *Nat*  
1170 *Commun* [Internet]. 2011;2:530. Available from:  
1171 <http://www.ncbi.nlm.nih.gov/pubmed/22068597>
- 1172 54. Khan S, Garg A, Camacho N, Van Rooyen J, Kumar Pole A, Belrhali H, et al. Structural  
1173 analysis of malaria-parasite lysyl-tRNA synthetase provides a platform for drug development.  
1174 *Acta Crystallogr Sect D Biol Crystallogr* [Internet]. 2013 [cited 2017 May 22];69:785–95.  
1175 Available from: <http://scripts.iucr.org/cgi-bin/paper?S0907444913001923>
- 1176 55. Saint-Léger A, Sinadinos C, Ribas de Pouplana L. The growing pipeline of natural  
1177 aminoacyl-tRNA synthetase inhibitors for malaria treatment. *Bioengineered*. 2016;7:60–4.
- 1178 56. Ebere, Palencia A, Guo D, Ahyong V, Dong C, Li X, et al. Antimalarial Benzoxaboroles  
1179 Target. 2016;60:4886–95.
- 1180 57. Jain V, Kikuchi H, Oshima Y, Sharma A, Yogavel M. Structural and functional analysis  
1181 of the anti-malarial drug target prolyl-tRNA synthetase. *J Struct Funct Genomics*.  
1182 2014;15:181–90.
- 1183 58. Keller TL, Zocco D, Sundrud MS, Hendrick M, Edenius M, Yum J, et al. Halofuginone  
1184 and other febrifugine derivatives inhibit prolyl- tRNA synthetase. 2012;8:311–7.
- 1185 59. Hoepfner D, McNamara CW, Lim CS, Studer C, Riedl R, Aust T, et al. Selective and  
1186 specific inhibition of the plasmodium falciparum lysyl-tRNA synthetase by the fungal  
1187 secondary metabolite cladosporin. *Cell Host Microbe* [Internet]. Elsevier Inc.; 2012;11:654–  
1188 63. Available from: <http://dx.doi.org/10.1016/j.chom.2012.04.015>
- 1189 60. Hewitt SN, Dranow DM, Horst BG, Abendroth JA, Forte B, Hallyburton I, et al.  
1190 Biochemical and Structural Characterization of Selective Allosteric Inhibitors of the

- 1191 *Plasmodium falciparum* Drug Target, Prolyl-tRNA-synthetase. ACS Infect Dis [Internet].  
1192 2017 [cited 2017 May 22];3:34–44. Available from:  
1193 <http://pubs.acs.org/doi/abs/10.1021/acsinfecdis.6b00078>
- 1194 61. Sonoiki E, Palencia A, Guo D, Ahyong V, Dong C, Li X, et al. Antimalarial  
1195 Benzoxaboroles Target Plasmodium falciparum Leucyl-tRNA Synthetase. Antimicrob  
1196 Agents Chemother [Internet]. American Society for Microbiology; 2016 [cited 2018 Jun  
1197 12];60:4886–95. Available from: <http://www.ncbi.nlm.nih.gov/pubmed/27270277>
- 1198 62. Jain V, Yogavel M, Oshima Y, Kikuchi H, Touquet B, Hakimi MA, et al. Structure of  
1199 prolyl-tRNA synthetase-halofuginone complex provides basis for development of drugs  
1200 against malaria and toxoplasmosis. Structure [Internet]. Elsevier Ltd; 2015;23:819–29.  
1201 Available from: <http://dx.doi.org/10.1016/j.str.2015.02.011>
- 1202 63. Jain V, Yogavel M, Kikuchi H, Oshima Y, Hariguchi N, Matsumoto M, et al. Targeting  
1203 Prolyl-tRNA Synthetase to Accelerate Drug Discovery against Malaria, Leishmaniasis,  
1204 Toxoplasmosis, Cryptosporidiosis, and Coccidiosis. Structure [Internet]. Elsevier Ltd.;  
1205 2017;25:1495–1505.e6. Available from: <http://dx.doi.org/10.1016/j.str.2017.07.015>
- 1206 64. Son J, Lee EH, Park M, Kim JH, Kim J, Kim S, et al. Conformational changes in human  
1207 prolyl-tRNA synthetase upon binding of the substrates proline and ATP and the inhibitor  
1208 halofuginone. Acta Crystallogr Sect D Biol Crystallogr. 2013;69:2136–45.
- 1209 65. Zhou H, Sun, Litao Yang X-L, And Schimmel P. ATP-Directed Capture of Bioactive  
1210 Herbal-Based Medicine on Human tRNA Synthetase. 2015;2:147–85.
- 1211 66. Burrows JN, Chibale K, Wells TNC. The state of the art in anti-malarial drug discovery  
1212 and development. Curr Top Med Chem. 2011;11:1226–54.
- 1213 67. Baker DA. Malaria gametocytogenesis. Mol Biochem Parasitol [Internet]. Elsevier B.V.;

- 1214 2010;172:57–65. Available from: <http://dx.doi.org/10.1016/j.molbiopara.2010.03.019>
- 1215 68. Pham JS, Dawson KL, Jackson KE, Lim EE, Pasaje CFA, Turner KEC, et al. Aminoacyl-  
1216 tRNA synthetases as drug targets in eukaryotic parasites. *Int. J. Parasitol. Drugs Drug Resist.*  
1217 2014. p. 1–13.
- 1218 69. Chihade JW, Brown JR, Schimmel PR, de Poupiana LR. Origin of mitochondria in  
1219 relation to evolutionary history of eukaryotic alanyl-tRNA synthetase. *Proc Natl Acad Sci U*  
1220 *S A.* 2000;97:12153–7.
- 1221 70. Poupiana LR De, Schimmel P. Visions & Reflections A view into the origin of life :  
1222 aminoacyl-tRNA synthetases. *Nature.* 2000;57:865–70.
- 1223 71. Faya N, Penkler DL, Tastan Bishop Ö. Human, vector and parasite Hsp90 proteins: A  
1224 comparative bioinformatics analysis. *FEBS Open Bio.* 2015;5:916–27.
- 1225 72. Pink R, Hudson A, Mouriès MA, Bendig M. Opportunities and challenges in antiparasitic  
1226 drug discovery. *Nat Rev Drug Discov.* 2005;4:727–40.
- 1227 73. Bunjun S, Stathopoulos C, Graham D, Min B, Kitabatake M, Wang a L, et al. A dual-  
1228 specificity aminoacyl-tRNA synthetase in the deep-rooted eukaryote *Giardia lamblia*. *Proc*  
1229 *Natl Acad Sci U S A.* 2000;97:12997–3002.
- 1230 74. Hatherley R, Clitheroe CL, Faya N, Tastan Bishop Ö. *Plasmodium falciparum* Hop:  
1231 Detailed analysis on complex formation with Hsp70 and Hsp90. *Biochem Biophys Res*  
1232 *Commun.* 2015;456:440–5.
- 1233 75. Hatherley R, Blatch GL, Bishop ÖT. *Plasmodium falciparum* Hsp70-x: A heat shock  
1234 protein at the host-parasite interface. *J Biomol Struct Dyn.* 2014;32:1766–79.
- 1235 76. Shibata S, Gillespie JR, Kelley AM, Napuli AJ, Zhang Z, Kovzun K V., et al. Selective  
1236 inhibitors of methionyl-tRNA synthetase have potent activity against *Trypanosoma brucei*

- 1237 infection in mice. *Antimicrob Agents Chemother.* 2011;55:1982–9.
- 1238 77. Dahl EL, Rosenthal PJ. Multiple antibiotics exert delayed effects against the *Plasmodium*  
1239 *falciparum* apicoplast. *Antimicrob Agents Chemother.* 2007;51:3485–90.
- 1240 78. Schimmel P. Development of tRNA synthetases and connection to genetic code and  
1241 disease. *Protein Sci.* 2008;17:1643–52.
- 1242 79. Richa Agarwala, Tanya Barrett, Jeff Beck, Dennis A. Benson, Colleen Bollin, Evan  
1243 Bolton, Devon Bourexis, J. Rodney Brister, Stephen H. Bryant, Kathi Canese, Karen Clark,  
1244 Michael DiCuccio, Ilya Dondoshansky, Scott Federhen, Michael Feolo, Kathryn Funk, L  
1245 KZ. Database resources of the National Center for Biotechnology Information. *Nucleic Acids*  
1246 *Res* [Internet]. 2014;41:1–12. Available from:  
1247 <http://www.ncbi.nlm.nih.gov/pubmed/25398906>
- 1248 80. The UniProt Consortium. UniProt: a hub for protein information. *Nucleic Acids Res*  
1249 [Internet]. 2015;43:D204-12. Available from:  
1250 <http://nar.oxfordjournals.org/cgi/content/long/43/D1/D204>
- 1251 81. Eriani G, Delarue M, Poch O, Gangloff J, Moras D. Partition of tRNA synthetases into  
1252 two classes based on mutually exclusive sets of sequence motifs. *Lett to Nat.* 1990;347:203–  
1253 6.
- 1254 82. Cusack S. Aminoacyl-tRNA synthetases. *Curr Opin Struct Biol.* 1997;7:881–9.
- 1255 83. Berman HM, Westbrook J, Feng Z, Gilliland G, Bhat TN, Weissig H, et al. The Protein  
1256 Databank. *Nucleic Acids Res.* 2000;28:235–42.
- 1257 84. Bailey TL, Johnson J, Grant CE, Noble WS. The MEME Suite. *Nucleic Acids Res.*  
1258 2015;43:W39–49.
- 1259 85. Bailey TL, Gribskov M. Combining evidence using p-values: application to sequence



- 1260 homology searches. *Bioinformatics* [Internet]. 1998;14:48–54. Available from:  
1261 <https://academic.oup.com/bioinformatics/article-lookup/doi/10.1093/bioinformatics/14.1.48>
- 1262 86. Kelm S, Shi J, Deane CM. MEDELLER: Homology-based coordinate generation for  
1263 membrane proteins. *Bioinformatics*. 2010;26:2833–40.
- 1264 87. Söding J, Biegert A, Lupas AN. The HHpred interactive server for protein homology  
1265 detection and structure prediction. *Nucleic Acids Res*. 2005;33.
- 1266 88. Hatherley R, Brown DK, Glenister M, Bishop ÖT. PRIMO: An interactive homology  
1267 modeling pipeline. *PLoS One*. 2016;11:1–20.
- 1268 89. Jain V, Yogavel M, Sharma A. Dimerization of Arginyl-tRNA Synthetase by Free Heme  
1269 Drives Its Inactivation in *Plasmodium falciparum*. *Structure*. 2016;24:1476–87.
- 1270 90. Ojo KK, Ranade RM, Zhang Z, Dranow DM, Myers JB, Choi R, et al. *Brucella melitensis*  
1271 Methionyl-tRNA-Synthetase (MetRS), a potential drug target for brucellosis. *PLoS One*.  
1272 2016;11.
- 1273 91. Koh CY, Kim JE, Napoli AJ, Verlinde CLMJ, Fan E, Buckner FS, et al. Crystal structures  
1274 of *Plasmodium falciparum* cytosolic tryptophanyl-tRNA synthetase and its potential as a  
1275 target for structure-guided drug design. *Mol Biochem Parasitol*. 2013;189:26–32.
- 1276 92. Barros-Álvarez X, Kerchner KM, Koh CY, Turley S, Pardon E, Steyaert J, et al.  
1277 *Leishmania donovani* tyrosyl-tRNA synthetase structure in complex with a tyrosyl adenylate  
1278 analog and comparisons with human and protozoan counterparts. *Biochimie*. 2017;138:124–  
1279 36.
- 1280 93. Hewitt SN, Dranow DM, Horst BG, Abendroth JA, Forte B, Hallyburton I, et al.  
1281 Biochemical and structural characterization of selective allosteric inhibitors of the  
1282 *Plasmodium falciparum* drug target, prolyl-tRNA-synthetase. *ACS Infect Dis*. 2017;3:34–44.

- 1283 94. Ofir-Birin Y, Fang P, Bennett SP, Zhang H-M, Wang J, Rachmin I, et al. Structural  
1284 Switch of Lysyl-tRNA Synthetase between Translation and Transcription. *Mol Cell*  
1285 [Internet]. 2013 [cited 2017 May 23];49:30–42. Available from:  
1286 <http://linkinghub.elsevier.com/retrieve/pii/S1097276512008635>
- 1287 95. Wiederstein M, Sippl MJ. ProSA-web: Interactive web service for the recognition of  
1288 errors in three-dimensional structures of proteins. *Nucleic Acids Res.* 2007;35.
- 1289 96. Eisenberg D, Lüthy R, Bowie JU. VERIFY3D: Assessment of protein models with three-  
1290 dimensional profiles. *Methods Enzymol.* 1997;277:396–406.
- 1291 97. Benkert P, Künzli M, Schwede T. QMEAN server for protein model quality estimation.  
1292 *Nucleic Acids Res* [Internet]. 2009;37:W510–4. Available from:  
1293 <http://www.ncbi.nlm.nih.gov/pubmed/19429685>  
1294 <http://www.pubmedcentral.nih.gov/articlerender.fcgi?artid=PMC2703985>  
1295 <http://www.pubmedcentral.nih.gov/articlerender.fcgi?artid=2703985&tool=pmcentrez&rendertype=abstract>
- 1296 98. Di Tommaso P, Moretti S, Xenarios I, Orobítg M, Montanyola A, Chang JM, et al. T-  
1297 Coffee: A web server for the multiple sequence alignment of protein and RNA sequences  
1298 using structural information and homology extension. *Nucleic Acids Res.* 2011;39.
- 1299 99. Pei J, Kim BH, Grishin N V. PROMALS3D: A tool for multiple protein sequence and  
1300 structure alignments. *Nucleic Acids Res.* 2008;36:2295–300.
- 1301 100. Waterhouse AM, Procter JB, Martin DMA, Clamp M, Barton GJ. Jalview Version 2-A  
1302 multiple sequence alignment editor and analysis workbench. *Bioinformatics.* 2009;25:1189–  
1303 91.
- 1304 101. Kumar S, Stecher G, Tamura K. MEGA7: Molecular Evolutionary Genetics Analysis  
1305 Version 7.0 for Bigger Datasets. *Mol Biol Evol.* 2016;33:1870–4.

- 1306 102. Tamura K, Peterson D, Peterson N, Stecher G, Nei M, Kumar S. MEGA5: Molecular  
1307 evolutionary genetics analysis using maximum likelihood, evolutionary distance, and  
1308 maximum parsimony methods. *Mol Biol Evol.* 2011;28:2731–9.
- 1309 103. Jones DT, Taylor WR, Thornton JM. The rapid generation of mutation data matrices  
1310 from protein sequences. *Bioinformatics.* 1992;8:275–82.
- 1311 104. Ngan CH, Bohnuud T, Mottarella SE, Beglov D, Villar EA, Hall DR, et al. FTMAP:  
1312 Extended protein mapping with user-selected probe molecules. *Nucleic Acids Res.* 2012;40.
- 1313 105. Halgren T. New method for fast and accurate binding-site identification and analysis.  
1314 *Chem Biol Drug Des.* 2007;69:146–8.
- 1315 106. Halgren TA. Identifying and characterizing binding sites and assessing druggability. *J*  
1316 *Chem Inf Model.* 2009;49:377–89.
- 1317 107. Kozakov D, Grove LE, Hall DR, Bohnuud T, Mottarella SE, Luo L, et al. The FTMap  
1318 family of web servers for determining and characterizing ligand-binding hot spots of proteins.  
1319 *Nat Protoc.* 2015;10:733–55.
- 1320 108. Moras D. Structural and functional relationships between aminoacyl-tRNA synthetases.  
1321 *Trends Biochem Sci* [Internet]. 1992;17:159–64. Available from:  
1322 [papers3://publication/uuid/7E1AF307-2980-4379-933C-27969EA880B7](https://pubmed.ncbi.nlm.nih.gov/7495798)
- 1323 109. Fourmy D, Mechulam Y, Blanquet S. Crucial role of an idiosyncratic insertion in the  
1324 Rossman fold of class 1 aminoacyl-tRNA synthetases: the case of methionyl-tRNA  
1325 synthetase. *Biochemistry* [Internet]. 1995;34:15681–8. Available from:  
1326 <http://www.ncbi.nlm.nih.gov/pubmed/7495798>
- 1327 110. Mailu BM, Ramasamay G, Mudeppa DG, Li L, Lindner SE, Peterson MJ, et al. A  
1328 nondiscriminating glutamyl-tRNA synthetase in the plasmodium apicoplast: The first enzyme

- 1329 in an indirect aminoacylation pathway. *J Biol Chem.* 2013;288:32539–52.
- 1330 111. Mailu BM, Li L, Arthur J, Nelson TM, Ramasamy G, Fritz-Wolf K, et al. Plasmodium  
1331 apicoplast Gln-tRNA<sup>Gln</sup> biosynthesis utilizes a unique GatAB amidotransferase essential for  
1332 erythrocytic stage parasites. *J Biol Chem.* 2015;290:29629–41.
- 1333 112. Kyriacou S V., Deutscher MP. An Important Role for the Multienzyme Aminoacyl-  
1334 tRNA Synthetase Complex in Mammalian Translation and Cell Growth. *Mol Cell.*  
1335 2008;29:419–27.
- 1336 113. Khan S, Doerig C, Baker D, Billker O, Blackman M, Chitnis C, et al. Recent advances  
1337 in the biology and drug targeting of malaria parasite aminoacyl-tRNA synthetases. *Malar J*  
1338 [Internet]. 2016;15:203. Available from:  
1339 <http://malariajournal.biomedcentral.com/articles/10.1186/s12936-016-1247-0>
- 1340 114. Robinson JC, Kerjan P, Mirande M. Macromolecular assemblage of aminoacyl-tRNA  
1341 synthetases: Quantitative analysis of protein-protein interactions and mechanism of complex  
1342 assembly. *J Mol Biol.* 2000;304:983–94.
- 1343 115. Han JM, Kim JY, Kim S. Molecular network and functional implications of  
1344 macromolecular tRNA synthetase complex. *Biochem. Biophys. Res. Commun.* 2003. p. 985–  
1345 93.
- 1346 116. Lee SW. Aminoacyl-tRNA synthetase complexes: beyond translation. *J Cell Sci*  
1347 [Internet]. 2004;117:3725–34. Available from:  
1348 <http://jcs.biologists.org/cgi/doi/10.1242/jcs.01342>
- 1349 117. Guo M, Yang X-L, Schimmel P. New functions of aminoacyl-tRNA synthetases beyond  
1350 translation. *Nat Rev Mol Cell Biol* [Internet]. 2010;11:668–74. Available from:  
1351 <http://www.pubmedcentral.nih.gov/articlerender.fcgi?artid=3042954&tool=pmcentrez&rende>

1352 rtype=abstract

1353 118. Ko YG, Kim EK, Kim T, Park H, Park HS, Choi EJ, et al. Glutamine-dependent  
1354 Antiapoptotic Interaction of Human Glutaminyl-tRNA Synthetase with Apoptosis Signal-  
1355 regulating Kinase 1. *J Biol Chem.* 2001;276:6030–6.

1356 119. Han JM, Jeong SJ, Park MC, Kim G, Kwon NH, Kim HK, et al. Leucyl-tRNA  
1357 synthetase is an intracellular leucine sensor for the mTORC1-signaling pathway. *Cell.*  
1358 2012;149:410–24.

1359 120. Khan S, Garg A, Sharma A, Camacho N, Picchioni D, Saint-Léger A, et al. An  
1360 Appended Domain Results in an Unusual Architecture for Malaria Parasite Tryptophanyl-  
1361 tRNA Synthetase. *PLoS One.* 2013;8.

1362 121. Cusack S, Berthet-Colominas C, Härtle M, Nassar N, Leberman R. A second class of  
1363 synthetase structure revealed by X-ray analysis of *Escherichia coli* seryl-tRNA synthetase at  
1364 2.5 Å. *Nature.* 1990;347:249–55.

1365 122. Cavarelli J, Eriani G, Rees B, Ruff M, Boeglin M, Mitschler A, et al. The active site of  
1366 yeast aspartyl-tRNA synthetase: structural and functional aspects of the aminoacylation  
1367 reaction. *EMBO J* [Internet]. 1994;13:327–37. Available from:  
1368 <http://www.pubmedcentral.nih.gov/articlerender.fcgi?artid=394812&tool=pmcentrez&render>

1369 type=abstract

1370 123. Dignam JD, Guo J, Griffith WP, Garbett NC, Holloway A, Mueser T. Allosteric  
1371 interaction of nucleotides and tRNA ala with *E. coli* alanyl-tRNA synthetase. *Biochemistry.*  
1372 2011;50:9886–900.

1373 124. Arnez JG, Harris DC, Mitschler A, Rees B, Francklyn CS, Moras D. Crystal structure of  
1374 histidyl-tRNA synthetase from *Escherichia coli* complexed with histidyl-adenylate. *EMBO J.*

1375 1995;14:4143–55.

1376 125. Logan DT, Mazauric MH, Kern D, Moras D. Crystal structure of glycyl-tRNA  
1377 synthetase from *Thermus thermophilus*. *EMBO J* [Internet]. 1995;14:4156–67. Available  
1378 from:  
1379 <http://www.pubmedcentral.nih.gov/articlerender.fcgi?artid=394498&tool=pmcentrez&render>  
1380 [type=abstract](http://www.pubmedcentral.nih.gov/articlerender.fcgi?artid=394498&tool=pmcentrez&render)

1381 126. Onesti S, Miller AD, Brick P. The crystal structure of the lysyl-tRNA synthetase (LysU)  
1382 from *Escherichia coli*. *Structure*. 1995;3:163–76.

1383 127. Berthet-Colominas C, Seignovert L, Härtlein M, Grotli M, Cusack S, Leberman R. The  
1384 crystal structure of asparaginyl-tRNA synthetase from *Thermus thermophilus* and its  
1385 complexes with ATP and asparaginyl-adenylate: The mechanism of discrimination between  
1386 asparagine and aspartic acid. *EMBO J*. 1998;17:2947–60.

1387 128. Becker HD, Reinbolt J, Kreutzer R, Giegé R, Kern D. Existence of two distinct aspartyl-  
1388 tRNA synthetases in *Thermus thermophilus*. Structural and biochemical properties of the two  
1389 enzymes. *Biochemistry*. 1997;36:8785–97.

1390 129. Min B, Pelaschier JT, Graham DE, Tumbula-Hansen D, Söll D. Transfer RNA-  
1391 dependent amino acid biosynthesis: an essential route to asparagine formation. *Proc Natl*  
1392 *Acad Sci U S A* [Internet]. 2002;99:2678–83. Available from:  
1393 <http://www.pubmedcentral.nih.gov/articlerender.fcgi?artid=122407&tool=pmcentrez&render>  
1394 [type=abstract](http://www.pubmedcentral.nih.gov/articlerender.fcgi?artid=122407&tool=pmcentrez&render)

1395 130. Sheppard K, Yuan J, Hohn MJ, Jester B, Devine KM, Söll D. From one amino acid to  
1396 another: tRNA-dependent amino acid biosynthesis. *Nucleic Acids Res*. 2008;36:1813–25.

1397 131. Delarue M. Aminoacyl-tRNA synthetases. *Curr Opin Struct Biol* [Internet]. 1995;5:48–

- 1398 55. Available from: <http://www.ncbi.nlm.nih.gov/pubmed/7773747>
- 1399 132. Guigou L, Shalak V, Mirande M. The tRNA-Interacting Factor p43 Associates with  
1400 Mammalian Arginyl-tRNA Synthetase but Does Not Modify Its tRNA Aminoacylation  
1401 Properties. *Biochemistry*. 2004;43:4592–600.
- 1402 133. Ferber S, Ciechanover A. Role of arginine-tRNA in protein degradation by the ubiquitin  
1403 pathway. *Nature* [Internet]. 1987;326:808–11. Available from:  
1404 <http://www.ncbi.nlm.nih.gov/pubmed/3033511>
- 1405 134. Zheng YG, Wei H, Ling C, Xu MG, Wang ED. Two forms of human cytoplasmic  
1406 arginyl-tRNA synthetase produced from two translation initiations by a single mRNA.  
1407 *Biochemistry*. 2006;45:1338–44.
- 1408 135. Jeong EJ, Hwang GS, Kyung Hee Kim, Min Jung Kim, Kim S, Kim KS. Structural  
1409 analysis of multifunctional peptide motifs in human bifunctional tRNA synthetase:  
1410 Identification of RNA-binding residues and functional implications for tandem repeats.  
1411 *Biochemistry*. 2000;39:15775–82.
- 1412 136. Rho SB, Lee JS, Jeong EJ, Kim KS, Kim YG, Kim S. A multifunctional repeated motif  
1413 is present in human bifunctional tRNA synthetase. *J Biol Chem*. 1998;273:11267–73.
- 1414 137. Fett R, Knippers R. The primary structure of human glutamyl-tRNA synthetase: A  
1415 highly conserved core, amino acid repeat regions, and homologies with translation elongation  
1416 factors. *J Biol Chem*. 1991;266:1448–55.
- 1417 138. Rho SB, Kim MJ, Lee JS, Seol W, Motegi H, Kim S, et al. Genetic dissection of protein-  
1418 protein interactions in multi-tRNA synthetase complex. *Proc Natl Acad Sci U S A*.  
1419 1999;96:4488–93.
- 1420 139. Hsu JL, Martinis SA. A Flexible Peptide Tether Controls Accessibility of a Unique C-

- 1421 terminal RNA-binding Domain in Leucyl-tRNA Synthetases. *J Mol Biol.* 2008;376:482–91.
- 1422 140. Wakasugi K. Two Distinct Cytokines Released from a Human Aminoacyl-tRNA  
1423 Synthetase. *Science* (80- ) [Internet]. 1999;284:147–51. Available from:  
1424 <http://www.sciencemag.org/cgi/doi/10.1126/science.284.5411.147>
- 1425 141. Frugier M, Moulinier L, Giegé R. A domain in the N-terminal extension of class IIb  
1426 eukaryotic aminoacyl-tRNA synthetases is important for tRNA binding. *EMBO J* [Internet].  
1427 2000;19:2371–80. Available from:  
1428 <http://www.pubmedcentral.nih.gov/articlerender.fcgi?artid=384352&tool=pmcentrez&render>  
1429 [type=abstract](http://www.pubmedcentral.nih.gov/articlerender.fcgi?artid=384352&tool=pmcentrez&render)
- 1430 142. Dou X, Limmer S, Kreutzer R. DNA-binding of phenylalanyl-tRNA synthetase is  
1431 accompanied by loop formation of the double-stranded DNA. *J Mol Biol* [Internet].  
1432 2001;305:451–8. Available from: <http://www.ncbi.nlm.nih.gov/pubmed/11152603>
- 1433 143. de Oca MM, Engwerda C, Haque A. *Plasmodium berghei* ANKA (PbA) infection of  
1434 C57BL/6J mice: a model of severe malaria. [Internet]. *Methods Mol. Biol.* 2013. Available  
1435 from: <http://www.ncbi.nlm.nih.gov/pubmed/23824903>
- 1436 144. Otto TD, Böhme U, Jackson AP, Hunt M, Franke-Fayard B, Hoeijmakers WAM, et al.  
1437 A comprehensive evaluation of rodent malaria parasite genomes and gene expression. *BMC*  
1438 *Biol* [Internet]. 2014;12:86. Available from:  
1439 <http://bmcbiol.biomedcentral.com/articles/10.1186/s12915-014-0086-0>
- 1440 145. Mitsui H, Arisue N, Sakihama N, Inagaki Y, Horii T, Hasegawa M, et al. Phylogeny of  
1441 Asian primate malaria parasites inferred from apicoplast genome-encoded genes with special  
1442 emphasis on the positions of *Plasmodium vivax* and *P. fragile*. *Gene.* 2010;450:32–8.
- 1443 146. Pain A, Böhme U, Berry AE, Mungall K, Finn RD, Jackson AP, et al. The genome of



- 1444 the simian and human malaria parasite *Plasmodium knowlesi*. *Nature*. 2008;455:799–803.
- 1445 147. Carlton JM, Adams JH, Silva JC, Bidwell SL, Lorenzi H, Caler E, et al. Comparative  
1446 genomics of the neglected human malaria parasite *Plasmodium vivax*. *Nature*. 2008;455:757–  
1447 63.
- 1448 148. Höglind A, Areström I, Ehrnfelt C, Masjedi K, Zuber B, Giavedoni L, et al. Systematic  
1449 evaluation of monoclonal antibodies and immunoassays for the detection of Interferon- $\gamma$  and  
1450 Interleukin-2 in old and new world non-human primates. *J Immunol Methods*. 2017;441:39–  
1451 48.
- 1452 149. Le SQ, Gascuel O. An improved general amino acid replacement matrix. *Mol Biol Evol*.  
1453 2008;25:1307–20.
- 1454 150. Bishop ÖT, Kroon M. Study of protein complexes via homology modeling, applied to  
1455 cysteine proteases and their protein inhibitors. *J Mol Model*. 2011;17:3163–72.
- 1456 151. Shen MY, Sali A. Statistical potential for assessment and prediction of protein structures  
1457 [Internet]. *Protein Sci*. 2006. p. 2507–24. Available from:  
1458 <http://www.ncbi.nlm.nih.gov/pubmed/17075131>
- 1459 152. Eramian D, Shen M, Devos D, Melo F, Sali A, Marti-Renom MA. A composite score  
1460 for predicting errors in protein structure models. *Protein Sci* [Internet]. 2006;15:1653–66.  
1461 Available from: <http://doi.wiley.com/10.1110/ps.062095806>
- 1462 153. Marko AC, Stafford K, Wymore T. Stochastic pairwise alignments and scoring methods  
1463 for comparative protein structure modeling. *J Chem Inf Model* [Internet]. 2007;47:1263–70.  
1464 Available from: <http://www.ncbi.nlm.nih.gov/pubmed/17391002>
- 1465 154. Chen H, Kihara D. Estimating quality of template-based protein models by alignment  
1466 stability. *Proteins Struct Funct Genet*. 2008;71:1255–74.

- 1467 155. Koh CY, Kim JE, Napoli AJ, Verlinde CLMJ, Fan E, Buckner FS, et al. Crystal  
1468 structures of Plasmodium falciparum cytosolic tryptophanyl-tRNA synthetase and its  
1469 potential as a target for structure-guided drug design. Mol Biochem Parasitol [Internet].  
1470 Elsevier B.V.; 2013;189:26–32. Available from:  
1471 <http://dx.doi.org/10.1016/j.molbiopara.2013.04.007>
- 1472 156. Yang X-L, Otero FJ, Skene RJ, McRee DE, Schimmel P, Ribas de Pouplana L. Crystal  
1473 structures that suggest late development of genetic code components for differentiating  
1474 aromatic side chains. Proc Natl Acad Sci [Internet]. 2003;100:15376–80. Available from:  
1475 <http://www.pnas.org/cgi/doi/10.1073/pnas.2136794100>
- 1476 157. Koh CY, Kim JE, Shibata S, Ranade RM, Yu M, Liu J, et al. Distinct states of  
1477 methionyl-tRNA synthetase indicate inhibitor binding by conformational selection. Structure.  
1478 2012;20:1681–91.
- 1479

## Class I aaRS

**A**

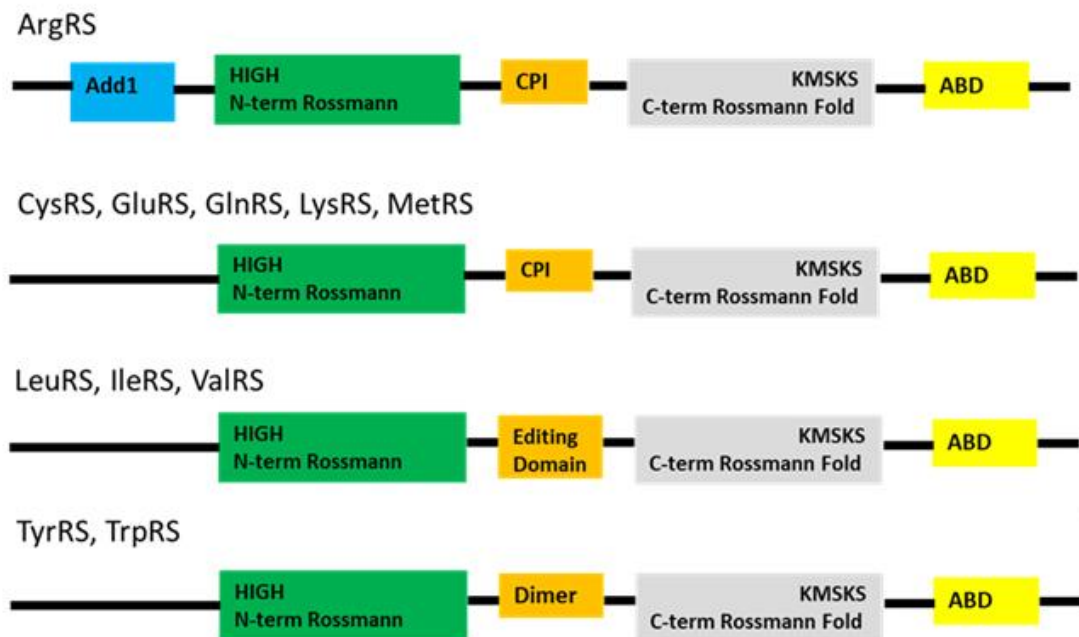

## Class II aaRS

**B**

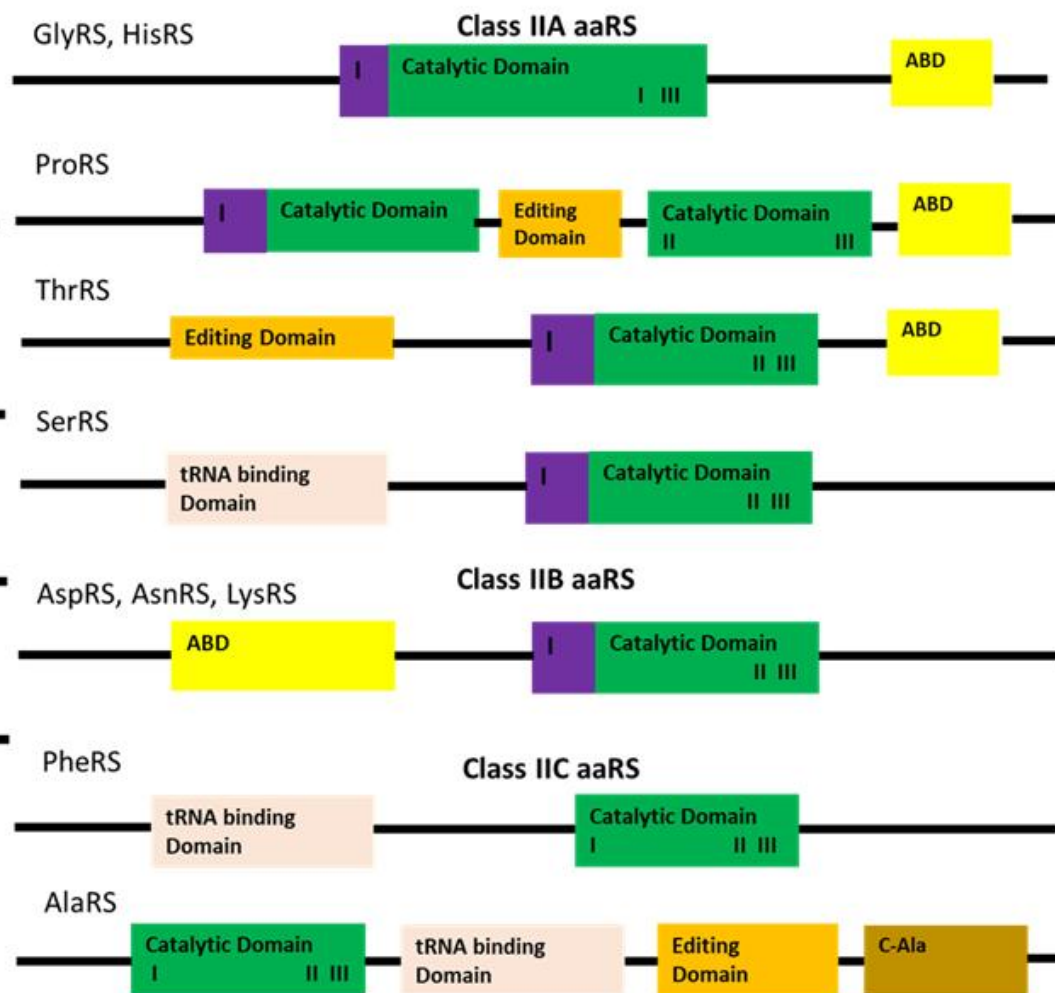

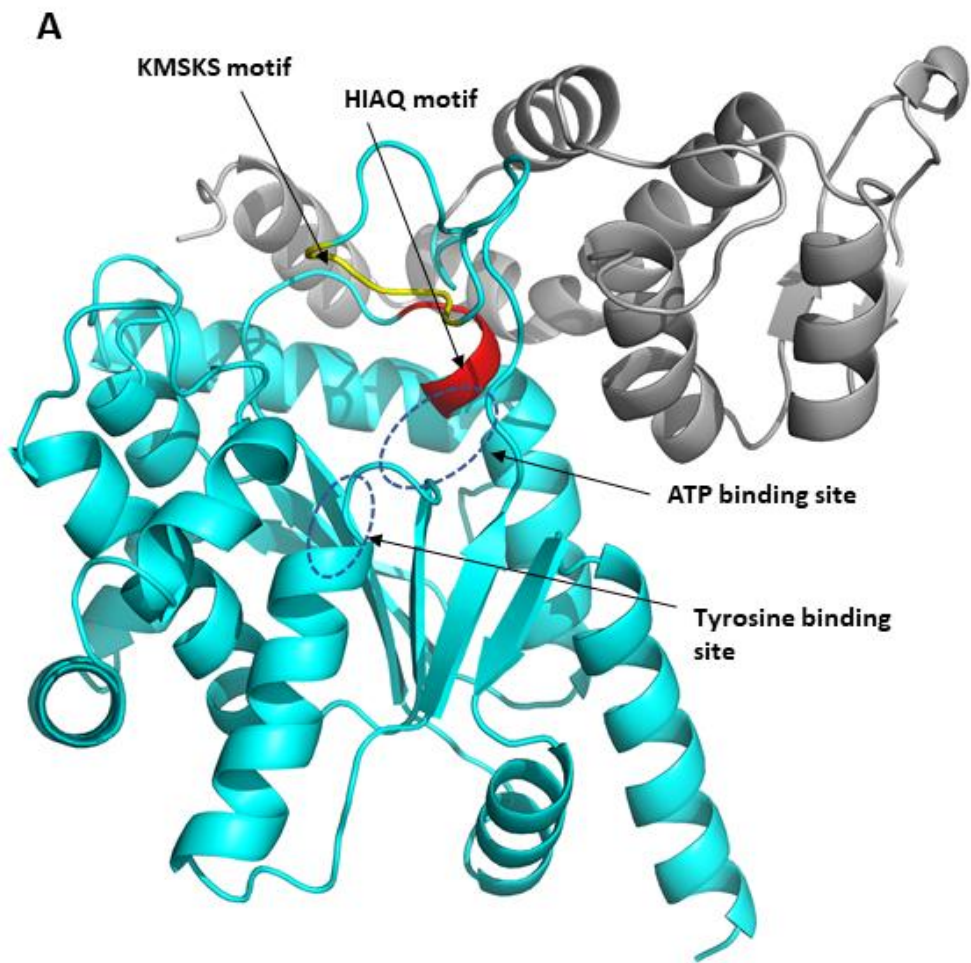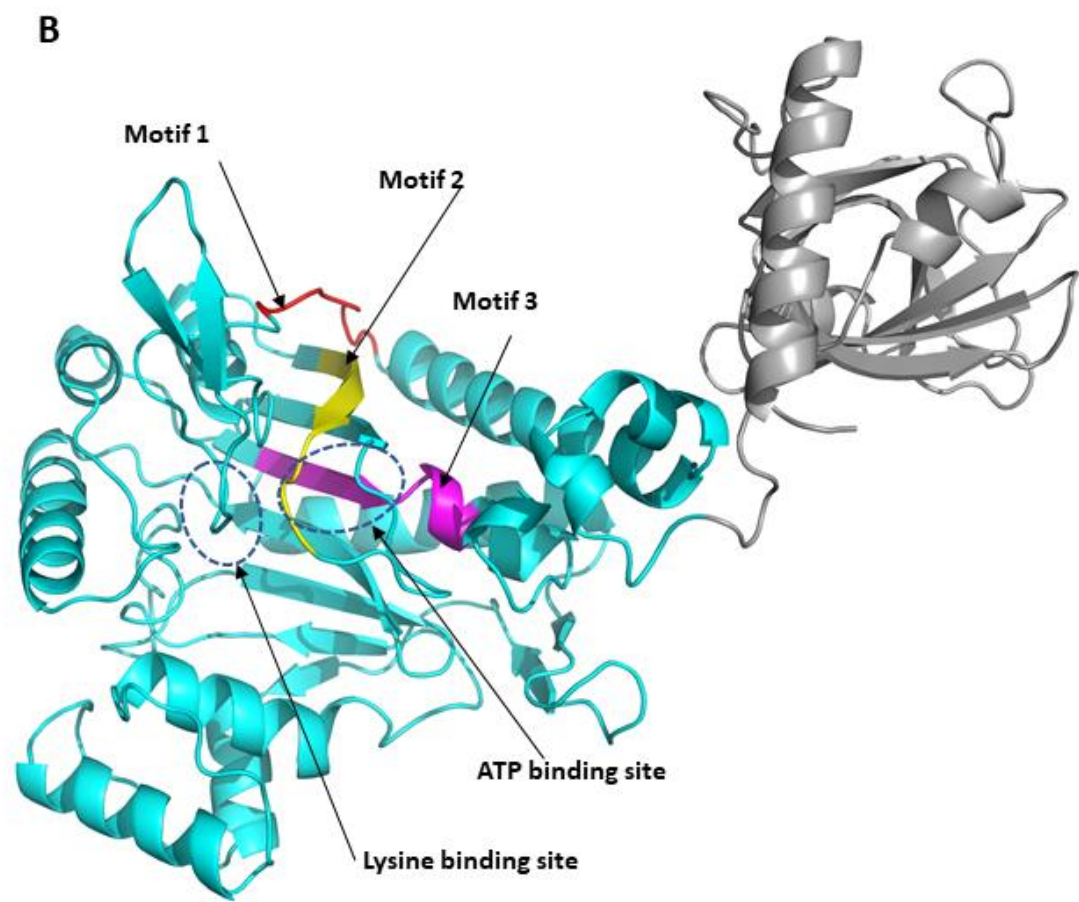











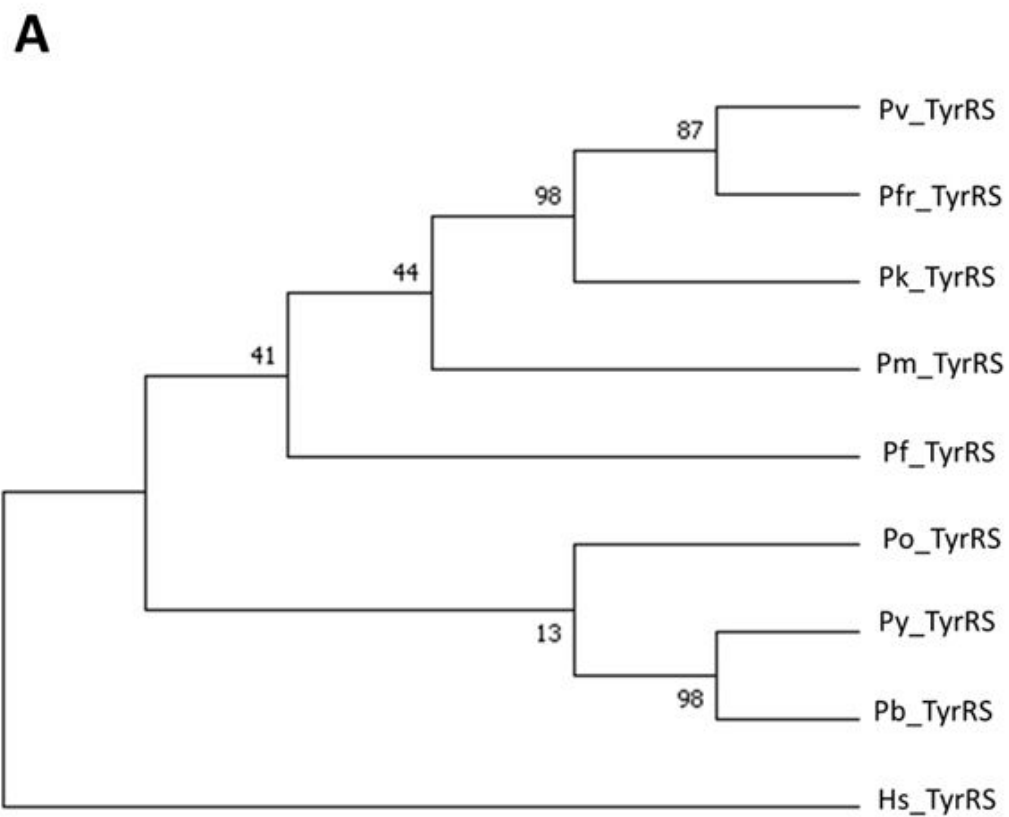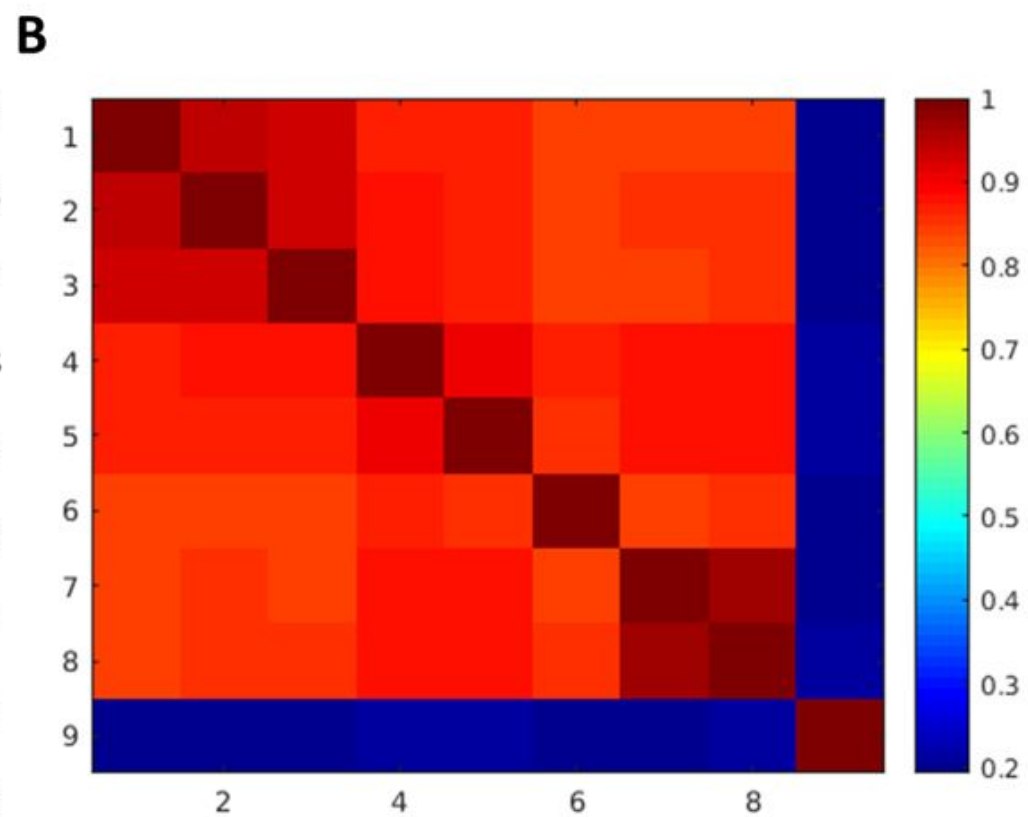

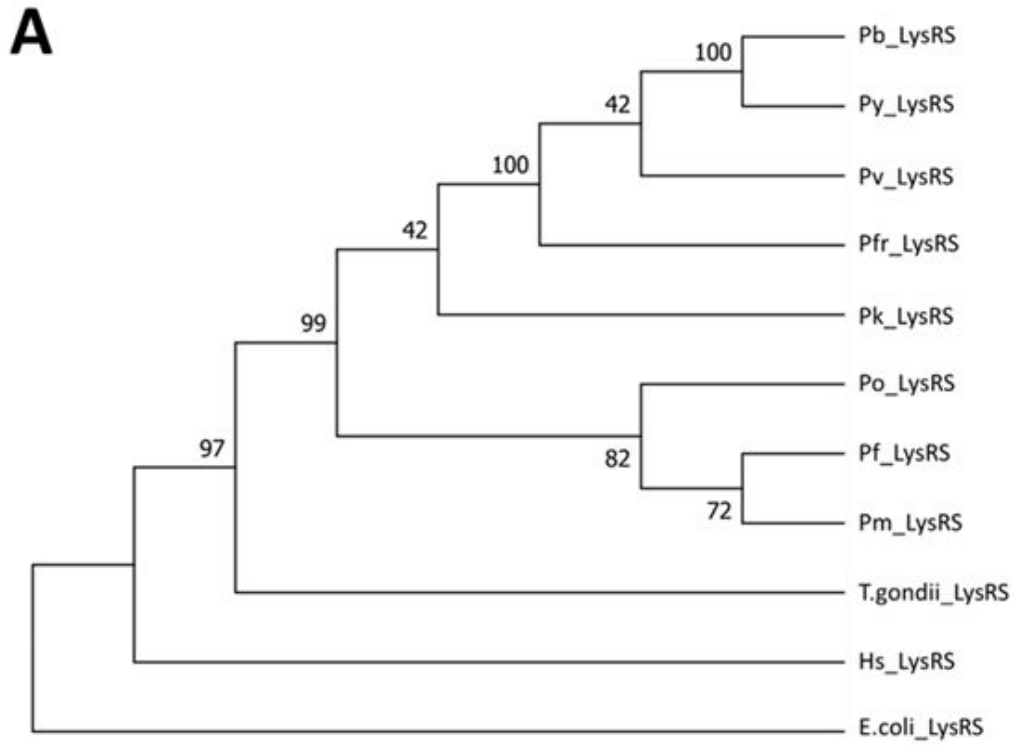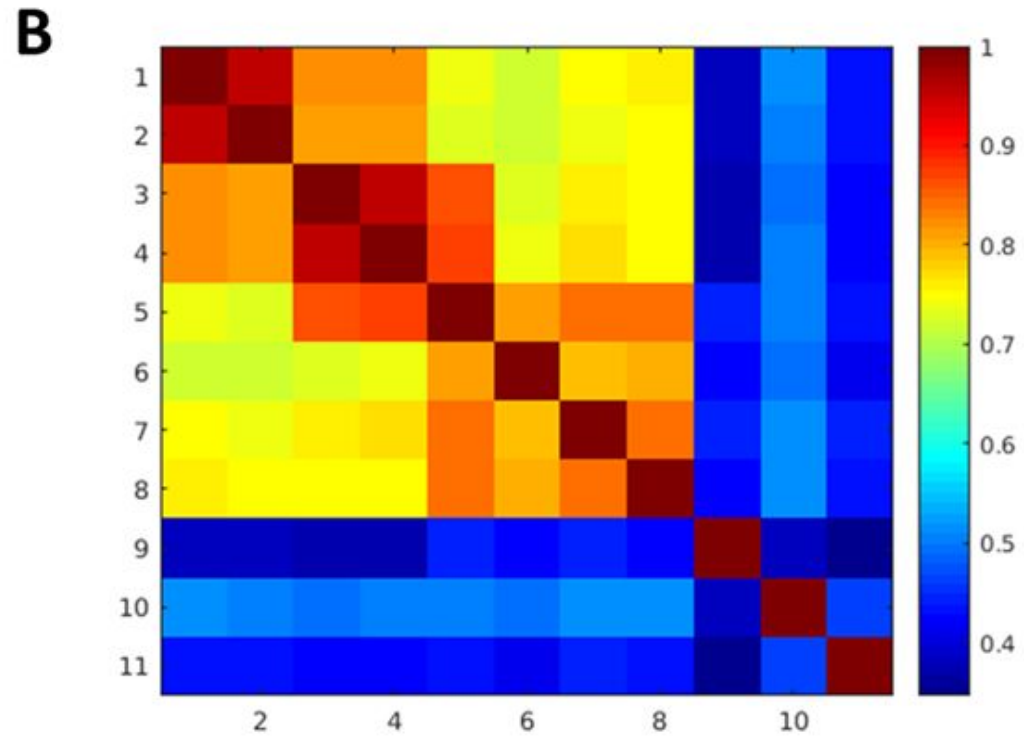

HsArgRS

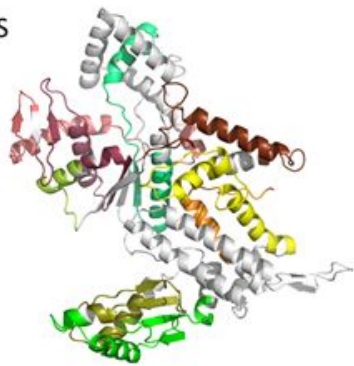

PfArgRS

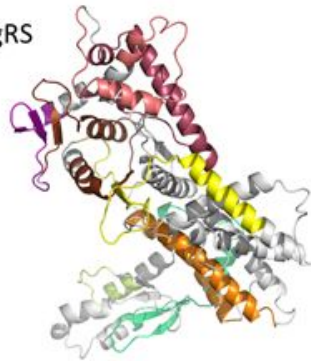

- Motif 3
- Motif 4
- Motif 5
- Motif 9
- Motif 10
- Motif 11
- Motif 13
- Motif 12
- Motif 16

HsTrpRS

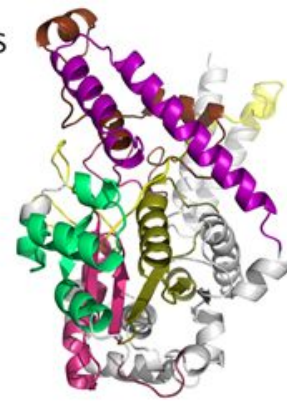

PfTrpRS

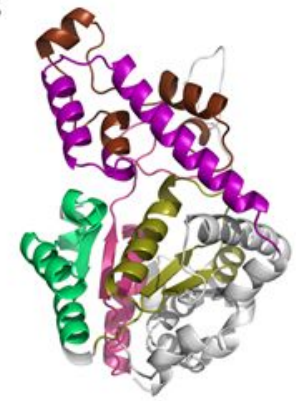

- Motif1
- Motif2
- Motif4
- Motif6
- Motif7
- Motif8
- Motif9
- Motif10
- Motif18

HsMetRS

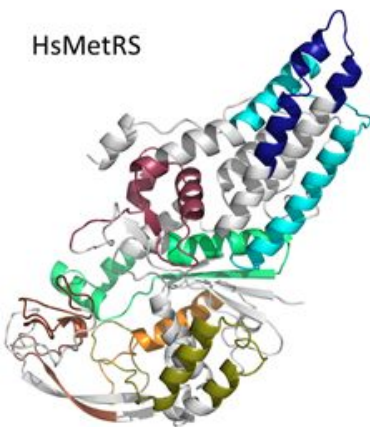

PfMetRS

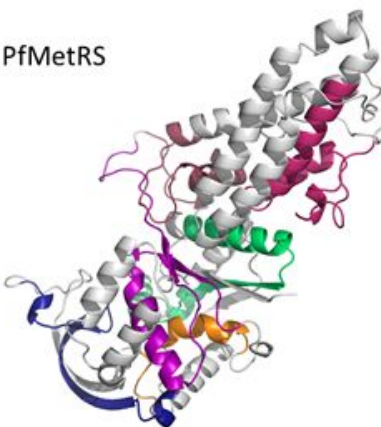

- Motif 1
- Motif 2
- Motif 3
- Motif 4
- Motif 5
- Motif 7
- Motif 10
- Motif 14
- Motif 16
- Motif 17
- Motif 19

HsTyrRS

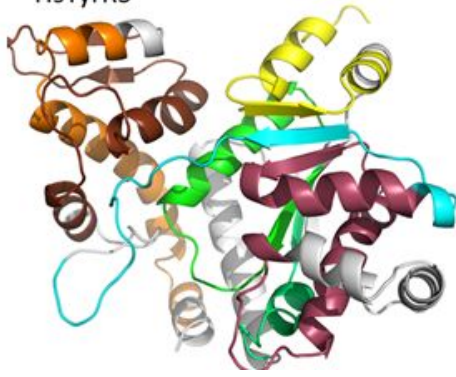

PfTyrRS

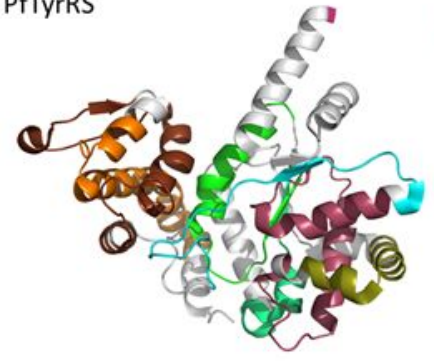

- Motif1
- Motif2
- Motif3
- Motif4
- Motif5
- Motif10
- Motif12
- Motif14
- Motif18

HsLysRS

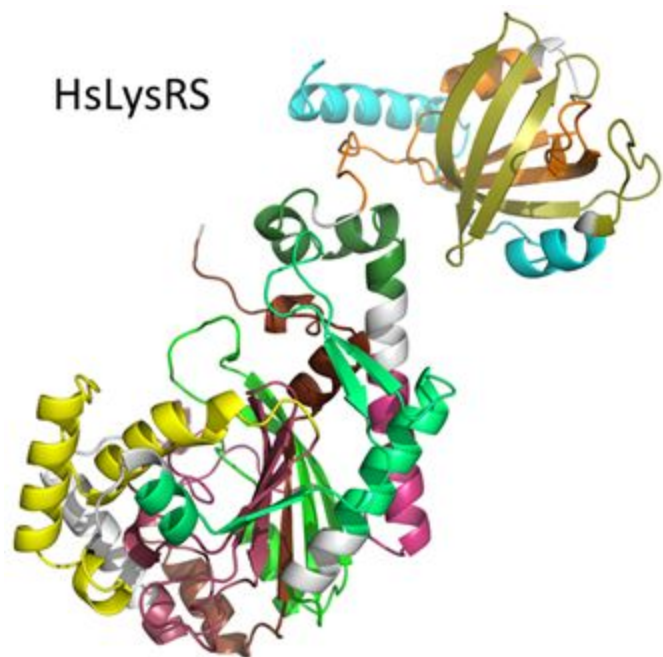

PfLysRS

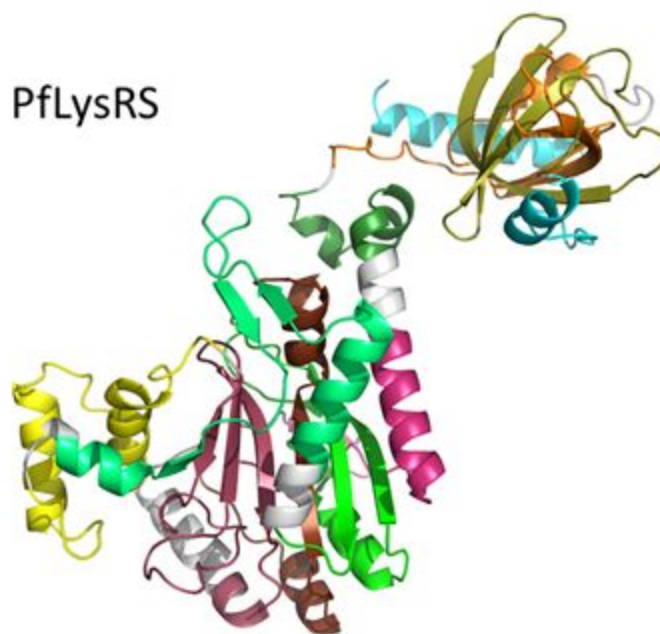

- Motif1
- Motif2
- Motif3
- Motif4
- Motif5
- Motif6
- Motif7
- Motif8
- Motif9
- Motif10
- Motif11

HsProRS

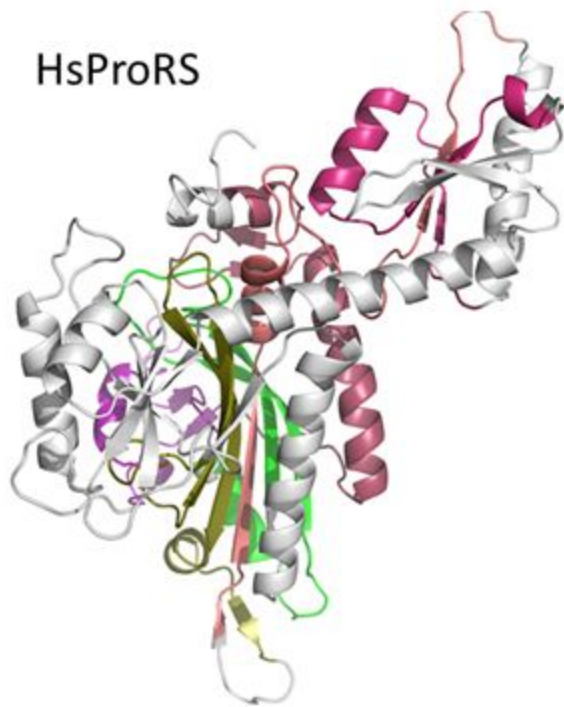

PfProRS

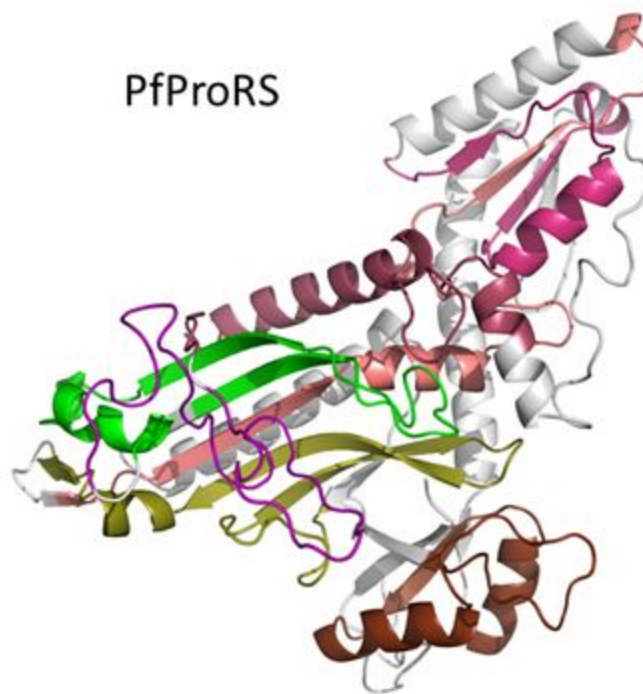

- Motif1
- Motif2
- Motif3
- Motif4
- Motif5
- Motif6
- Motif7
- Motif8
- Motif9
- Motif10

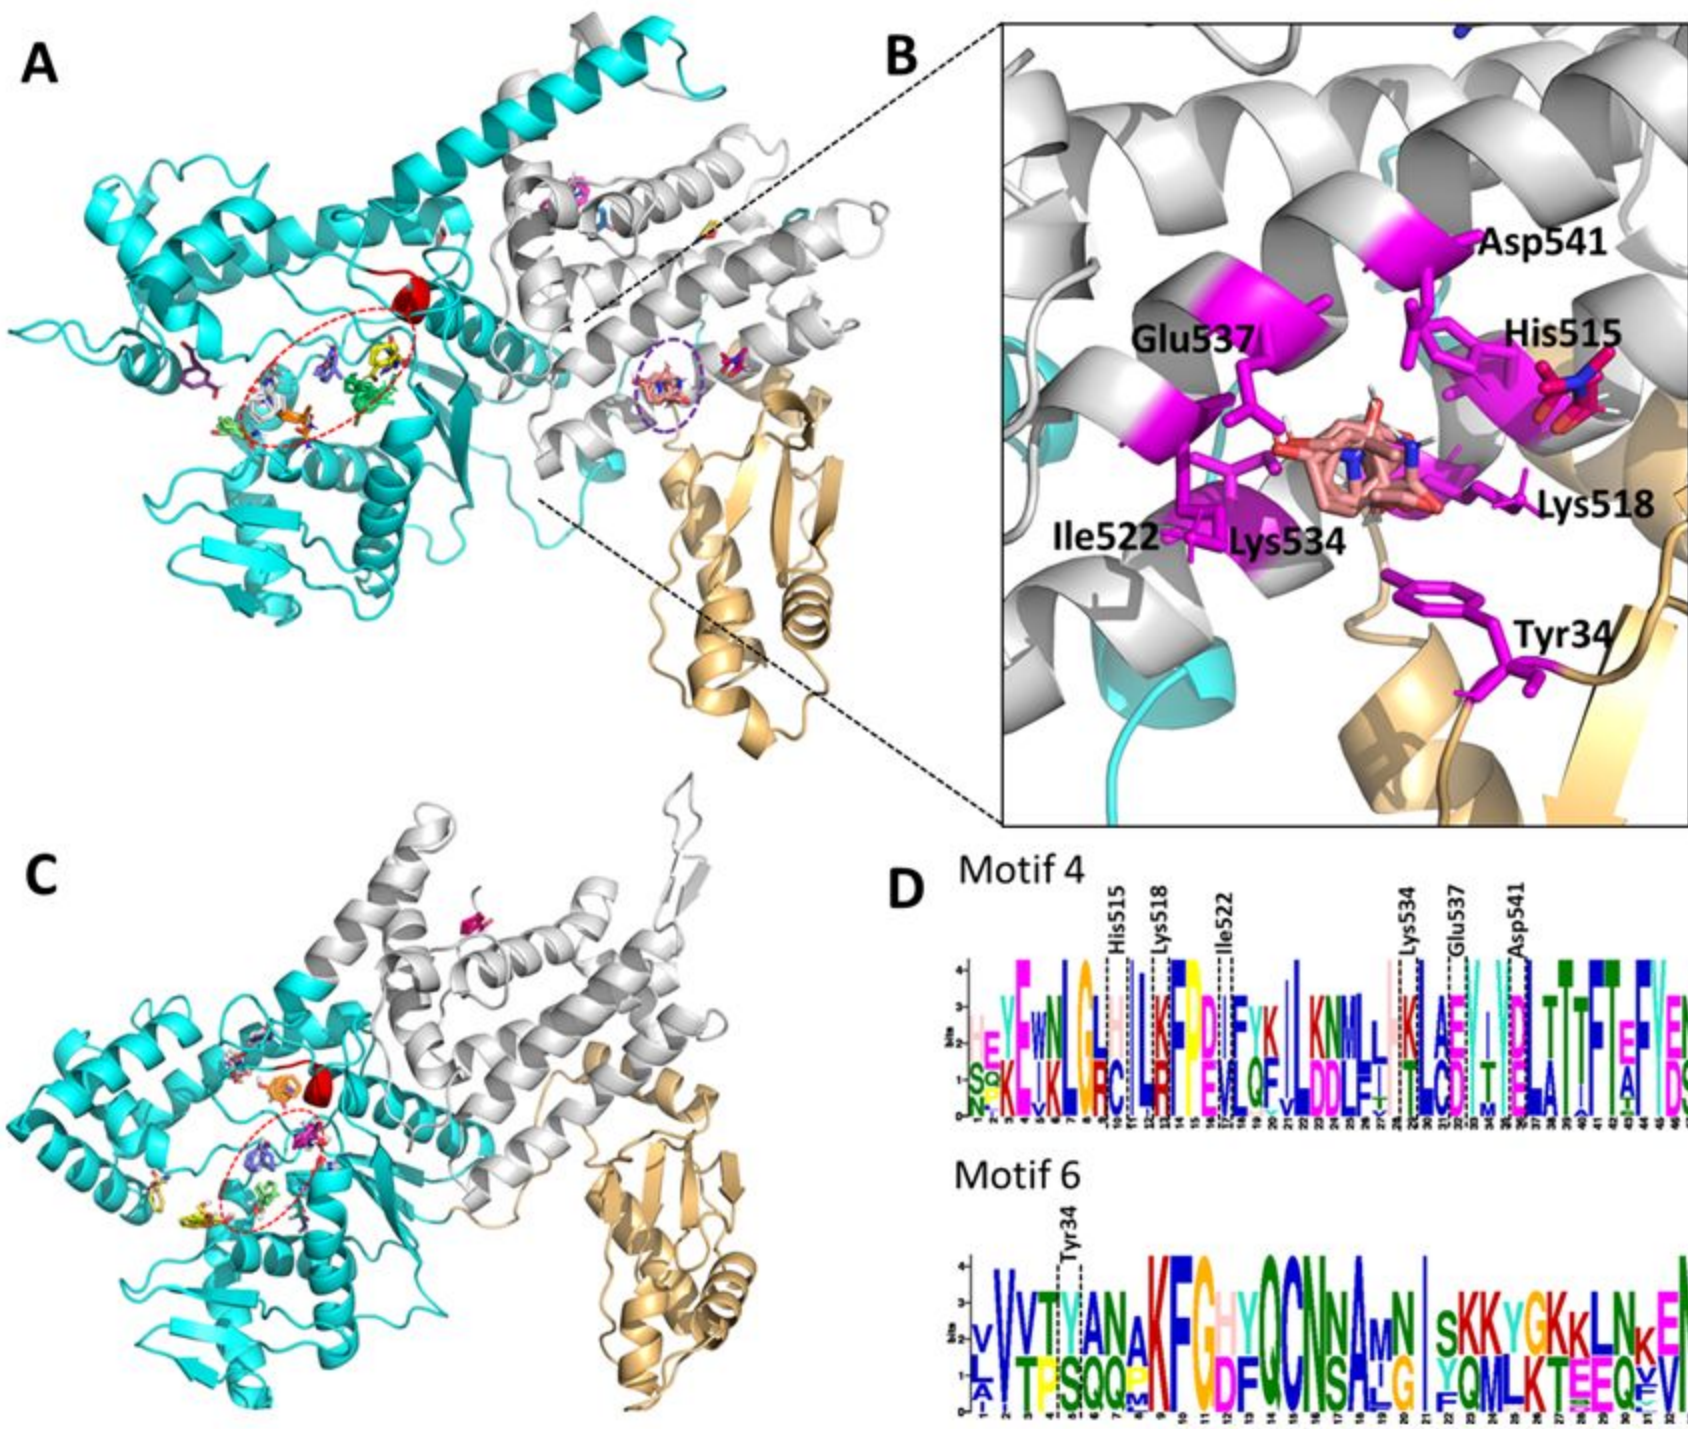

**A**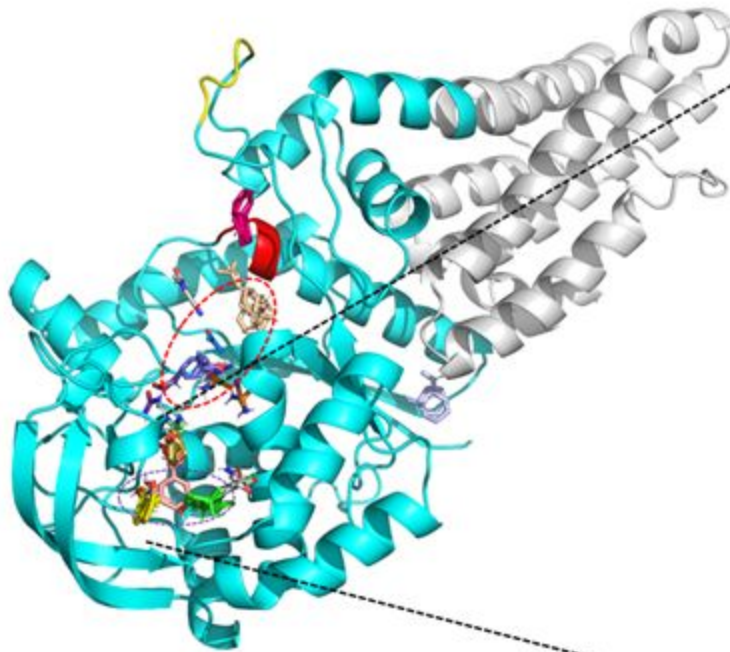**B**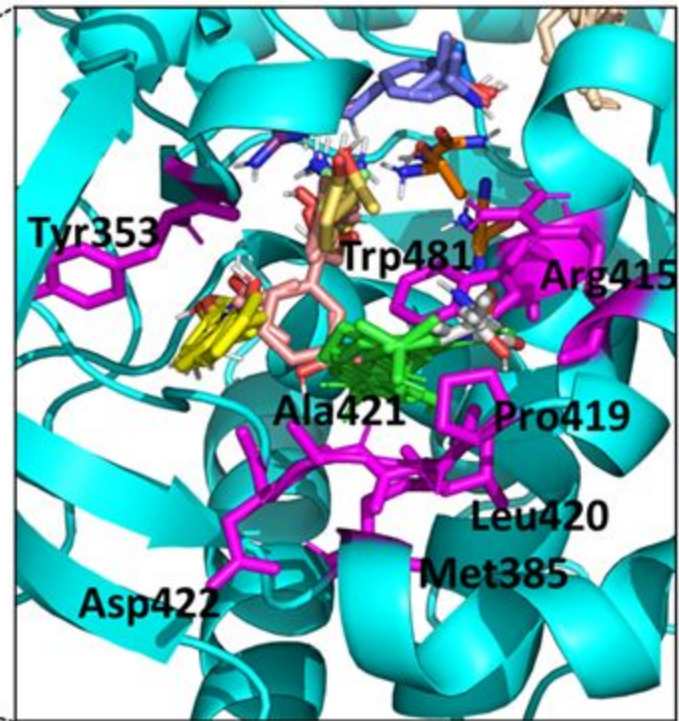**C**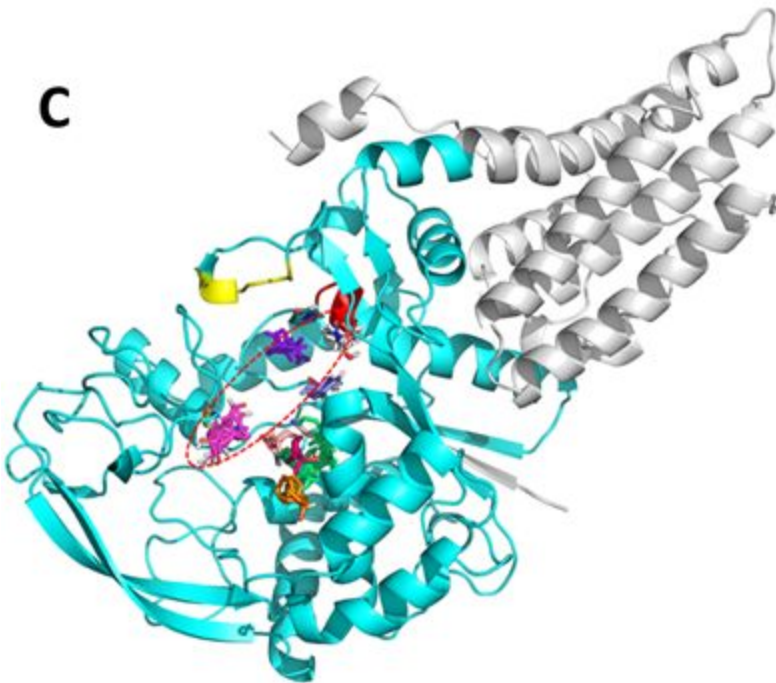**D**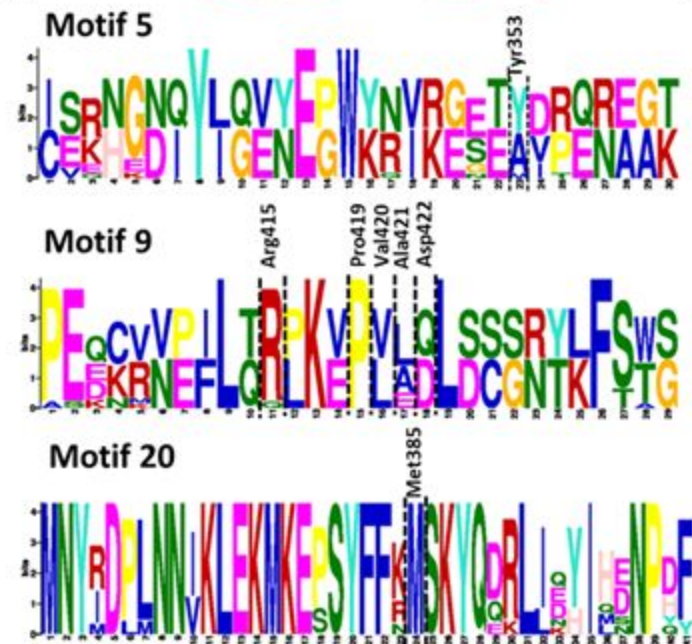

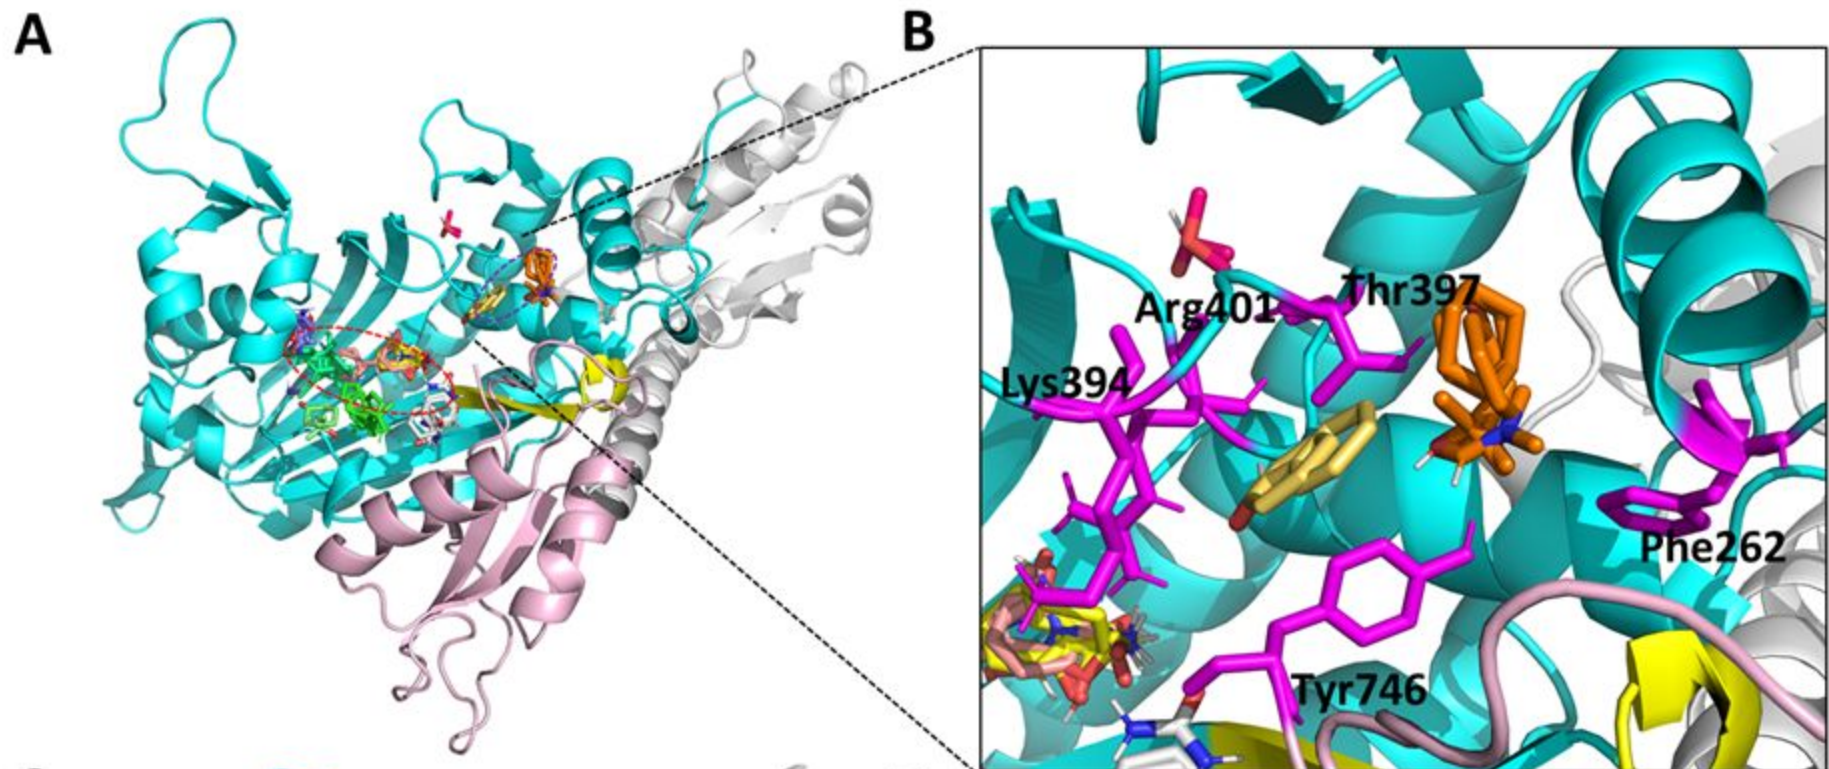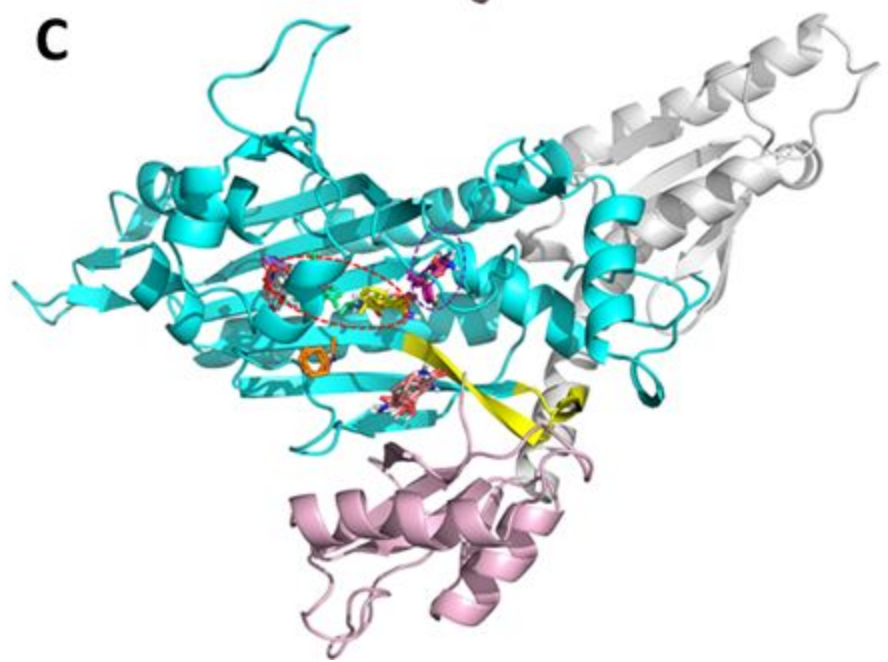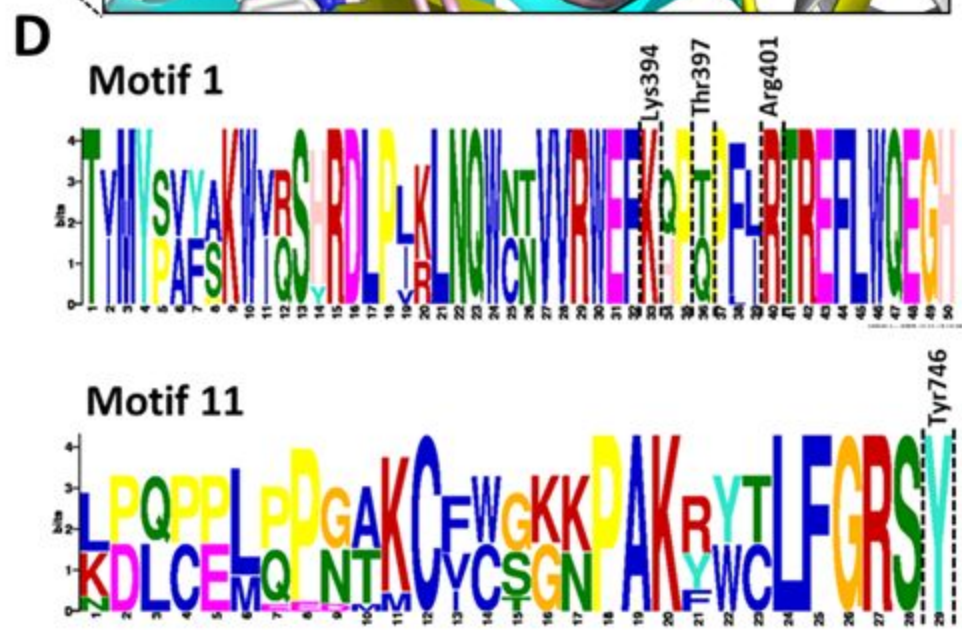

Source: https://www.biorxiv.org/content/10.1101/440891v1.full.pdf
